# Supplementary material for: RNF43/ZNRF3 negatively regulates taste tissue homeostasis and positively regulates dorsal lingual epithelial tissue homeostasis
Source: PubMed Central journal article supplement — Stem Cell Reports. 2022 Jan 6;17(2):369–83. doi: 10.1016/j.stemcr.2021.12.002 (PMC8828551; doi:10.1016/j.stemcr.2021.12.002), 2022-01-06
Supplement: mmc2.pdf [file mmc2.pdf]

# RNF43/ZNRF3 negatively regulates taste tissue homeostasis and positively regulates dorsal lingual epithelial tissue homeostasis

Chanyi Lu,<sup>1</sup> Xiaoli Lin,<sup>1</sup> Jumpei Yamashita,<sup>1</sup> Ranhui Xi,<sup>1</sup> Minliang Zhou,<sup>1</sup> Yali V. Zhang,<sup>1</sup> Hong Wang,<sup>1</sup> Robert F. Margolskee,<sup>1</sup> Bon-Kyoung Koo,<sup>2</sup> Hans Clevers,<sup>3</sup> Ichiro Matsumoto,<sup>1</sup> and Peihua Jiang<sup>1,\*</sup>

<sup>1</sup>Monell Chemical Senses Center, Philadelphia, PA 19104, USA

<sup>2</sup>Institute of Molecular Biotechnology of the Austrian Academy of Sciences (IMBA), Vienna BioCenter (VBC), Vienna, Austria

<sup>3</sup>Hubrecht Institute, University Medical Center Utrecht, and University Utrecht, Utrecht, the Netherlands

\*Correspondence: [pjiang@monell.org](mailto:pjiang@monell.org)

<https://doi.org/10.1016/j.stemcr.2021.12.002>

## SUMMARY

Taste bud cells are renewed throughout life in a process requiring innervation. Recently, we reported that R-spondin substitutes for neuronal input for taste cell regeneration. R-spondin amplifies WNT signaling by interacting with stem-cell-expressed E3 ubiquitin ligases RNF43/ZNRF3 (negative regulators of WNT signaling) and G-protein-coupled receptors LGR4/5/6 (positive regulators of WNT signaling). Therefore, we hypothesized that RNF43/ZNRF3 may serve as a brake, controlled by gustatory neuron-produced R-spondin, for regulating taste tissue homeostasis. Here, we show that mice deficient for *Rnf43/Znrf3* in KRT5-expressing epithelial stem/progenitor cells (*RZ* dKO) exhibited taste cell hyperplasia; in stark contrast, epithelial tissue on the tongue degenerated. WNT signaling blockade substantially reversed all these effects in *RZ* dKO mice. Furthermore, innervation becomes dispensable for taste cell renewal in *RZ* dKO mice. We thus demonstrate important but distinct functions of RNF43/ZNRF3 in regulating taste versus lingual epithelial tissue homeostasis.

## INTRODUCTION

The sense of taste enables humans and other species to detect nutritious substances or potentially harmful/toxic substances (Bachmanov and Beauchamp, 2007; Chaudhari and Roper, 2010). Taste sensation begins when substances are detected by a variety of taste receptor cells clustered in taste buds, comprising different taste fields in the oral cavity: in anterior tongue, fungiform papillae typically house single taste buds (e.g., rodents), whereas, in posterior tongue, the circumvallate papillae and foliate papillae contain many dozens of taste buds each. Once taste receptor cells are activated by taste stimuli, these cells send signals to the brain to generate taste sensation or perception (Bachmanov and Beauchamp, 2007; Chaudhari and Roper, 2010).

Despite the sensory nature of taste bud cells, they are epithelial cells, not nerve cells, and, like other epithelial cells, taste cells turn over throughout life (Beidler and Smallman, 1965), with an average life span of about 1–2 weeks (Barlow and Klein, 2015; Perea-Martinez et al., 2013). This rapid turnover requires continuous generation of new taste cells by taste stem/progenitor cells, and interruption of this process can lead to an altered sense of taste (Barlow and Klein, 2015).

Taste tissue homeostasis is regulated, in part, by gustatory (taste-related) neurons. A well-known phenomenon described more than a century ago is that cutting the gustatory nerve leads to degeneration of taste buds; once the nerve has healed, taste buds regenerate (Cheal and Oakley, 1977; Guth, 1958; Olmsted, 1921; Vintschgau and Hönigschmied, 1876). Previously, we and others demonstrated that the pro-

tein LGR5 uniquely marks adult taste stem/progenitor cells (Aihara et al., 2015; Ren et al., 2014, 2017; Takeda et al., 2013; Yee et al., 2013). Recently, we showed that R-spondin, the ligand for the LGR4/5/6 receptors, as well as for the RNF43/ZNRF3 receptors, can substitute for neuronal input for taste cell regeneration, suggesting that one or more members of the R-spondin family (e.g., RSPO2) may be the gustatory-neuron-derived factor that regulates LGR5-expressing taste stem/progenitor cells to maintain taste tissue homeostasis (Lin et al., 2021).

R-spondin interacts both with LGR4/5/6 and with the two E3 ligases RNF43/ZNRF3 to regulate stem cell activity (de Lau et al., 2011, 2014; Hao et al., 2012; Koo et al., 2012). In intestinal epithelial stem cells, RNF43/ZNRF3 act as negative regulators of WNT signaling, whereas LGRs act as positive regulators (de Lau et al., 2014). Loss of *Rnf43/Znrf3* in intestinal epithelial tissue leads to overgrowth of gut epithelial tissue (hyperplasia) (Koo et al., 2012), whereas loss of *Lgr4/5* leads to abolishment of the crypt stem cell compartment (de Lau et al., 2011). This ternary interaction among LGRs, RNF43/ZNRF3, and R-spondin regulates WNT signaling and thus either promotes or retards stem cell proliferation and differentiation (de Lau et al., 2014).

Despite these recent advances in understanding the R-spondin–LGR4/5/6–RNF43/ZNRF3 pathway, its role in taste stem cell regulation and other tissues is as yet undefined. Here we show (1) that *Rnf43/Znrf3* is expressed in the lingual and taste stem/progenitor cell compartments (i.e., basal cells of lingual and taste epithelium where stem/progenitor cells reside); (2) that ablation of *Rnf43/Znrf3* in lingual epithelium, including taste stem/progenitor cells, leads to taste

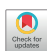

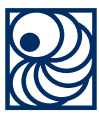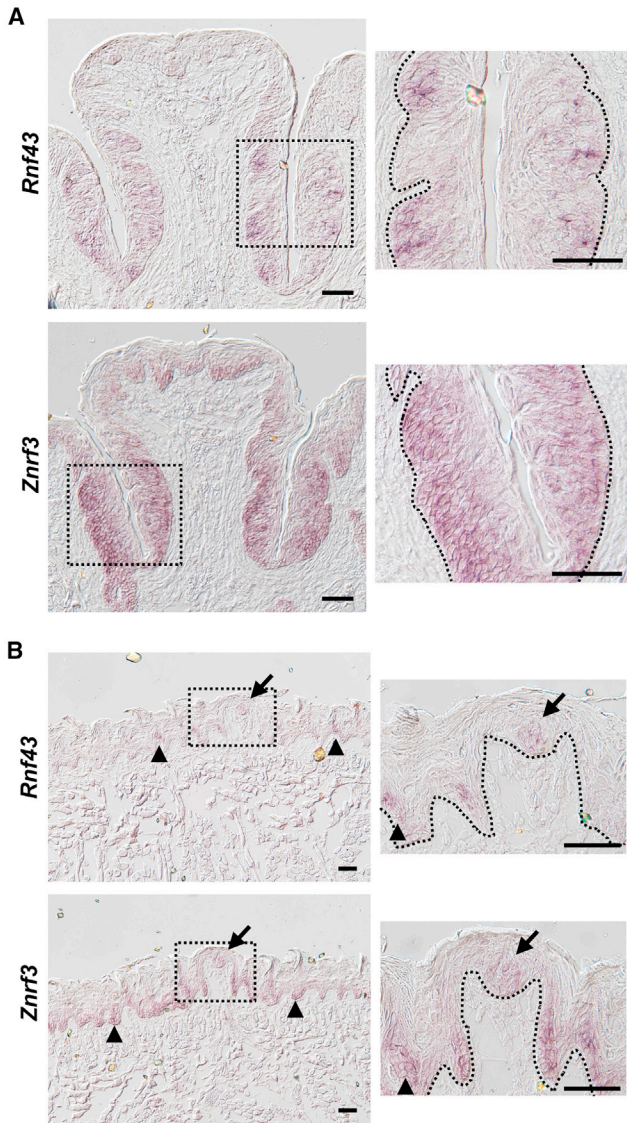

**Figure 1. Expression of *Rnf43* and *Znr3* in the circumvallate papillae, fungiform papillae, and surrounding lingual epithelium**

(A and B) *In situ* hybridization of *Rnf43* and *Znr3* with antisense riboprobes in circumvallate papilla in posterior tongue (A) and in fungiform papillae and the surrounding lingual epithelium (e.g., filiform papillae) in anterior tongue (B). Dotted lines in insets demarcate epithelial-mesenchymal boundaries. Arrows, fungiform papillae; arrowheads, filiform papillae. Scale bars, 50  $\mu\text{m}$ .

cell hyperplasia but lingual epithelial cell degeneration; and (3) that the effects of RNF43/ZNRF3 on both lingual and taste epithelium appear to be mediated by WNT signaling, but in opposite directions. Importantly, taste cell hyperplasia in *Rnf43/Znr3* double-knockout (RZ dKO) mice resembled the effect of exogenous R-spondin we previously showed (Lin et al., 2021): regeneration of taste cells occurred

in the RZ dKO mice even in the absence of nerve input (i.e., after nerve transection).

We thus propose the following model: in the oral cavity, RNF43/ZNRF3 regulates activity of stem/progenitor cells through WNT signaling, in a tissue-dependent pattern. In taste epithelium, gustatory-neuron-derived R-spondin interacts with taste stem/progenitor-cell-expressed RNF43/ZNRF3 to regulate taste stem cell activity: RNF43/ZNRF3 acts as a brake for adult taste stem/progenitor cells; R-spondin releases the RNF43/ZNRF3 brake to allow stem cells to become active to generate mature taste cells. In contrast, in lingual epithelial tissues, RNF43/ZNRF3 appears to be required for maintaining lingual epithelial tissue, serving a promoting rather than braking function.

## RESULTS

### *Rnf43* and *Znr3* are expressed in the taste and lingual basal cell compartments, where stem/progenitor cells are typically located

Previous transcriptome analysis of taste tissue demonstrated the presence of both *Rnf43* and *Znr3* in taste tissue (Hevezi et al., 2009). In other tissues, *Rnf43/Znr3* are often found in the stem/progenitor cell compartment and appear to serve redundant functions (Koo et al., 2012). To determine whether *Rnf43* and *Znr3* are expressed in taste stem/progenitor cells, we performed *in situ* hybridization using antisense riboprobes. We found that both *Rnf43* and *Znr3* are expressed in the basal cell compartment underneath taste buds in the circumvallate papilla; *Rnf43* distribution appears to be more restricted in the basal cell compartment (e.g., only underlying taste buds) (Figure 1A). Nevertheless, some apparent signals were detected even within taste buds outside the basal cell compartment for both *Rnf43* and *Znr3* (Figure 1A). In anterior tongue, we detected *Rnf43* and *Znr3* in the basal cell compartment underneath taste buds in the fungiform papillae (arrow), as well as in the lingual epithelial layer (i.e., in filiform papillae, which do not contain taste buds; arrowhead) (Figure 1B). Again, *Rnf43* distribution appears to be more restricted in the basal cell compartment than *Znr3*. Furthermore, both *Rnf43* and *Znr3* *in situ* signals were detected within taste buds as well. Given their expression pattern and their established function in stem cells in other tissues, both molecules may function in both taste and lingual stem/progenitor cells.

### Ablation of *Rnf43/Znr3* leads to a wrinkled and thinner dorsal lingual surface with reduced numbers of proliferating lingual cells

To determine if RNF43/ZNRF3 act as regulators for taste tissue homeostasis, as demonstrated in intestinal epithelium,

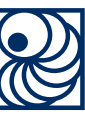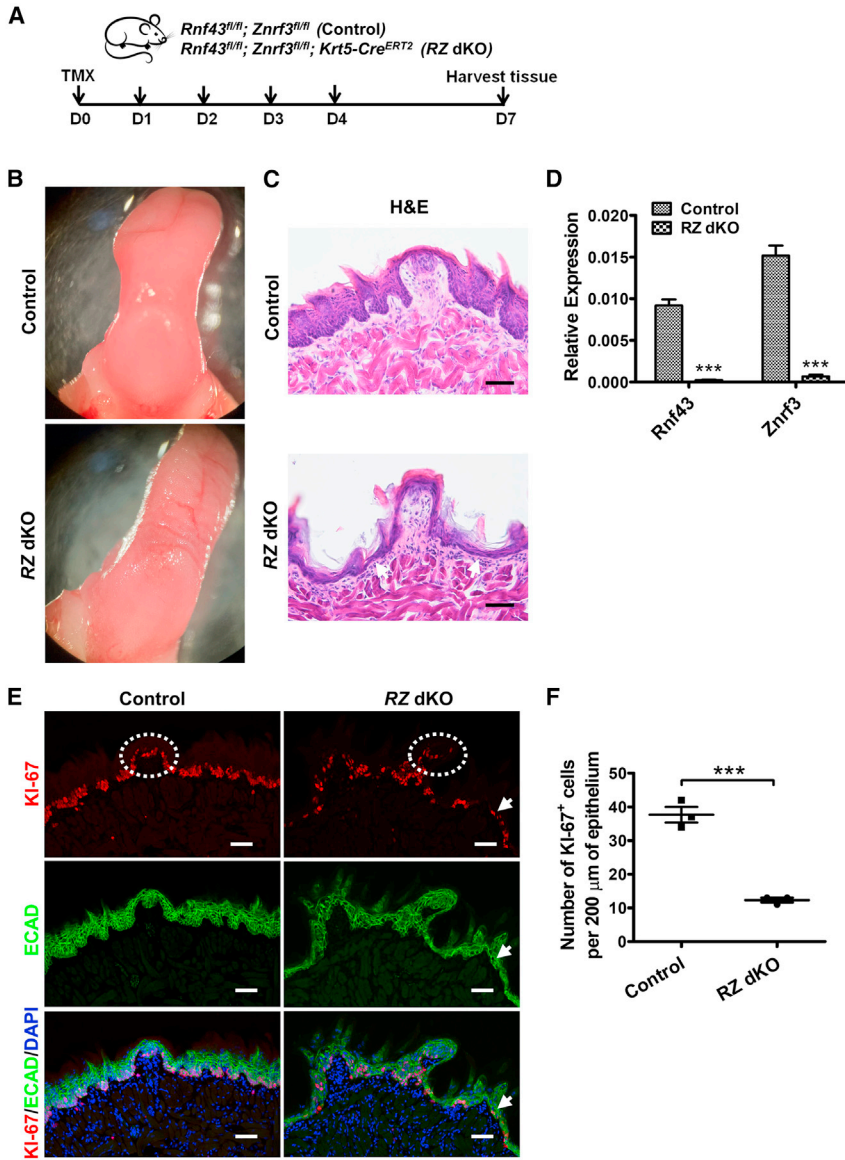

**Figure 2. Ablation of *Rnf43/Znrf3* leads to a wrinkled tongue and thinner tongue epithelium**

(A) Schematic illustration of the experimental design. Control (*Rnf43<sup>fl/fl</sup>; Znrf3<sup>fl/fl</sup>*) and *Rnf43<sup>fl/fl</sup>; Znrf3<sup>fl/fl</sup>; Krt5-Cre<sup>ERT2</sup>* mice were treated with tamoxifen for five continuous days (D0–D4), and tongue tissue was collected at day 7. TMX, tamoxifen.

(B) Representative bright-field images of tongues collected from control (n = 3) and RZ dKO (n = 3) mice.

(C) Representative images of hematoxylin and eosin (H&E) staining of anterior tongue sections from control and RZ dKO mice. Note the thinner lingual epithelium (arrows) in RZ dKO mice. n = 3 for each group. Scale bars, 50 μm.

(D) qRT-PCR analysis of the expression of *Rnf43* and *Znrf3* in tongue epithelium in control and RZ dKO mice. Expression levels of *Rnf43* and *Znrf3* were normalized to *Gapdh*. Data are presented as mean ± SEM. \*\*\*p < 0.0001. n = 3 for control group and n = 4 for RZ dKO group.

(E) Immunofluorescence staining of sections of anterior tongues of control and RZ dKO mice for KI-67 (red) and E-cadherin (ECAD, green). We frequently noted a single layer of sparse KI-67<sup>+</sup> cells in the dorsal lingual epithelium in RZ dKO sections (arrow), but not in sections from control mice. Dashed circles show fungiform papillae. Cell nuclei were counterstained with DAPI (blue). n = 3 for each group. Scale bars, 50 μm.

(F) Tabulation of KI-67<sup>+</sup> cells in the dorsal lingual epithelium. Fewer KI-67<sup>+</sup> cells are present in the dorsal lingual epithelium of RZ dKO mice than of control mice. Data are presented as mean ± SEM. \*\*\*p = 0.0005. n = 3 for each group. See also Figures S1.

we designed a strategy to specifically ablate these two molecules in KRT5-expressing epithelial tissue. This strategy was used previously for investigating taste tissue maintenance (Ohmoto et al., 2020). To generate the RZ dKO mice, we injected *Krt5<sup>CreERT2/+</sup>; Rnf43<sup>fl/fl</sup>; Znrf3<sup>fl/fl</sup>* mice with tamoxifen for five consecutive days and analyzed taste tissues at day 7 (Figure 2A). After day 7, mice showed significant body weight loss and lethality, preventing us from further analysis. The gross morphology of the tongue differed between RZ dKO and control mice (*Rnf43<sup>fl/fl</sup>; Znrf3<sup>fl/fl</sup>* mice, also treated with tamoxifen) (Figure 2B). As typically observed in normal wild-type mice, in control mice the dorsal surface of the anterior tongue was smooth (Figures 2B and 2C). However, in the RZ dKO mice, the dorsal surface was un-

even, with shrinkage in the anterior field (Figures 2B and 2C). In contrast, the ventral surface appeared to be normal, suggesting that ablation of *Rnf43/Znrf3* led to dorsal lingual epithelial tissue atrophy. We confirmed the ablation of these two genes by quantitative RT-PCR (qRT-PCR) (Figure 2D).

We further analyzed the anterior tongue using the cell proliferation marker KI-67 and epithelial cell marker E-cadherin (ECAD). Control mice had two to three layers of KI-67<sup>+</sup> cells at the basal part of the dorsal tongue epithelium, and multiple layers of ECAD<sup>+</sup> cells (Figure 2E). In contrast, in RZ dKO mice, only a single layer of sparsely distributed KI-67<sup>+</sup> cells and a thin layer of ECAD<sup>+</sup> cells were detected in a large portion of the dorsal lingual epithelium, which had filiform (nontaste) papillae but was devoid of

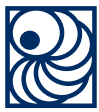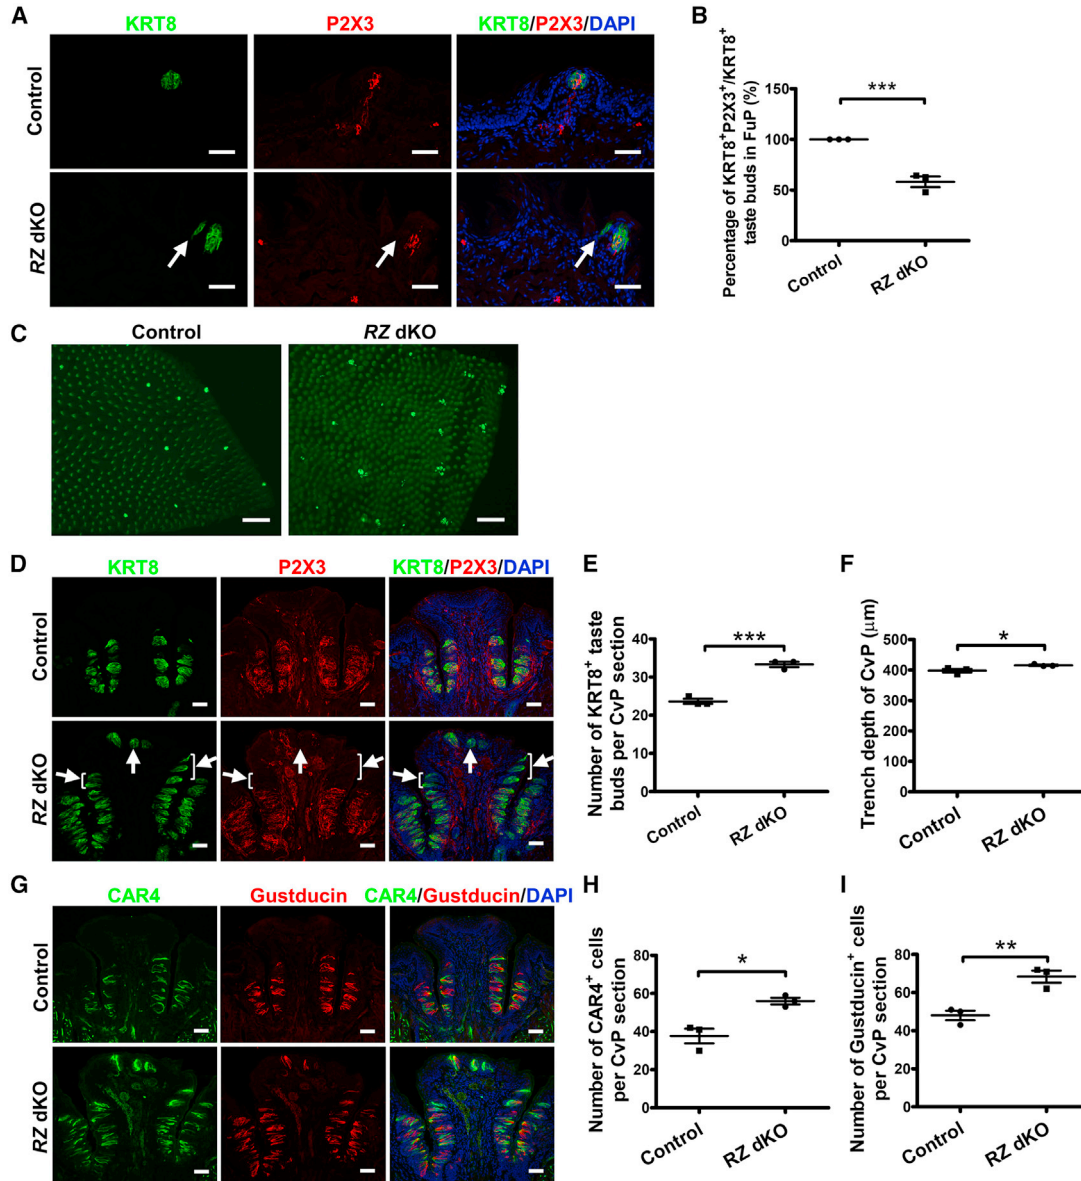

**Figure 3. Deletion of *Rnf43/Znrf3* leads to taste tissue hyperplasia in the fungiform papillae and circumvallate papilla**

(A) Immunofluorescence staining for KRT8 (green) and P2X3 (red) in fungiform papillae. Ectopic (uninnervated) taste bud cells (arrow) are present near fungiform taste buds in dKO mice. Cell nuclei were counterstained with DAPI (blue).  $n = 3$  for each group. Scale bars, 50  $\mu\text{m}$ .

(B) Percentage of KRT8<sup>+</sup> taste buds that are also positive for P2X3 (i.e., innervated) in fungiform papillae (FuP). Data are presented as mean  $\pm$  SEM. \*\*\* $p = 0.0001$ .  $n = 3$  for each group. Each point represents a single mouse.

(C) Representative images of KRT8 immunostaining of whole-mount tongue epithelium in the tip of the tongue. Unlike the single KRT8<sup>+</sup> bright spot (i.e., KRT8<sup>+</sup> taste bud) in each fungiform papilla in control mice ( $n = 3$ ) shown in (A), here a few small scattered spots are visible in some fungiform papillae in RZ dKO mice ( $n = 3$ ). Scale bars, 200  $\mu\text{m}$ .

(D) Representative images of KRT8 and P2X3 immunostaining of circumvallate papilla sections from control and RZ dKO mice. KRT8<sup>+</sup> ectopic taste buds (arrows) are present in the upper cleft and dorsum of the circumvallate papilla in RZ dKO mice. Cell nuclei were counterstained with DAPI (blue).  $n = 3$  for each group. Scale bars, 50  $\mu\text{m}$ .

(E) Number of KRT8<sup>+</sup> taste buds in the circumvallate papilla from control and RZ dKO mice. Data are presented as mean  $\pm$  SEM. \*\*\* $p = 0.0005$ .  $n = 3$  for each group. Each point represents a single mouse. CvP, circumvallate papilla.

(F) Analysis of the depth of trench of the circumvallate papilla in control and RZ dKO mice. Note the small variation of the depth of trench of the circumvallate papilla within the group. Data are presented as mean  $\pm$  SEM. \* $p = 0.049$ .  $n = 3$  for each group. CvP, circumvallate papilla.

(legend continued on next page)



fungiform (taste) papillae (Figure 2E, arrow). We found significantly fewer KI-67<sup>+</sup> cells in the dorsal lingual epithelium of RZ dKO mice than in control mice (Figure 2F). These results suggest that ablating *Rnf43/Znrf3* can affect dorsal lingual epithelial stem cell proliferation. In addition, the epithelium became much thinner, possibly because stem cells became quiescent in the absence of *Rnf43/Znrf3* (Figures 2C, 2E, and S1). In contrast to the dorsal lingual epithelium, the distribution pattern of KI-67<sup>+</sup> cells appeared to be comparable between control and RZ dKO mice in fungiform papillae (Figure 2E, circle). Although the configuration of fungiform taste buds makes quantifying the number of KI-67<sup>+</sup> cells difficult, RNF43/ZNRF3 appears to have distinct effects on lingual epithelium stem cells and taste stem cells on the dorsal tongue. At the same time, we noted thinner dorsal lingual epithelium, suggesting that lingual epithelium degenerated in the dKO mice, presumably due to slower or arrested proliferation/differentiation of dorsal lingual stem cells.

#### Conditional ablation of *Rnf43/Znrf3* leads to taste tissue hyperplasia in the fungiform papillae and in the circumvallate papilla

To determine if loss of *Rnf43/Znrf3* affects taste tissue homeostasis, we immunostained thin sections from RZ dKO mice and control mice using antibodies against the taste cell markers KRT8,  $\alpha$ -Gustducin, and CAR4, along with the taste neuron marker P2X3 to label gustatory nerve terminals. In control mice, as expected, KRT8<sup>+</sup> taste buds in fungiform papillae were all innervated by P2X3<sup>+</sup> terminals (Figure 3A). In contrast, small KRT8<sup>+</sup> taste buds that were not innervated by P2X3<sup>+</sup> nerve fibers (ectopically expressed taste bud cells) were frequently found near fungiform taste buds in dKO mice but never in control mice (Figures 3A and 3B).

Because fungiform taste buds are scattered throughout the dorsal surface of the tongue, sectioning them may not fully identify the distribution of ectopically expressed taste bud cells. We therefore adopted a different strategy to visualize fungiform taste buds and ectopic taste buds in a whole-mount preparation, using peeled tongue epithelium, which was previously described in Lu et al. (2018). After immunostaining the epithelium using the anti-KRT8 antibody, we immediately noted satellite ectopic cells near prototypical fungiform taste buds, consistent with results we obtained from thin-section staining, but in striking contrast to the pattern in control mice (Figures 3C

and S2). The generation of ectopic taste buds near fungiform papillae in RZ dKO mice suggests that RNF43/ZNRF3 act as negative regulators for taste tissue homeostasis and that deleting them promotes generation of additional taste buds and taste bud cells (e.g., satellite ectopic taste buds without gustatory innervation).

Next, we examined the circumvallate papillae in the posterior tongue. We observed numerous taste buds in the lateral trench wall, upper cleft region, and the dorsal surface of the circumvallate papillae in dKO mice, with a distribution pattern sharply distinct from control mice (Figure 3D). KRT8<sup>+</sup> taste cells, with a typical elongated shape, cluster with each other, which makes counting cells difficult. We therefore counted and compared taste buds in RZ dKO and control mice. In each section examined, the number of taste buds in RZ dKO mice was ~40% more than that in control mice (Figure 3E). However, the depth of the trench appears to be only slightly greater (4.4%) in RZ dKO than in control mice (control group, 398.2  $\pm$  5.865  $\mu$ m; RZ dKO group, 415.7  $\pm$  2.085  $\mu$ m; Figure 3F). The increased number of taste buds and taste bud cells is consistent with the presence of satellite taste buds we observed in anterior tongue. In addition, some taste buds in the dorsal surface and upper cleft of the circumvallate papillae appeared to be ectopic, as they had no P2X3<sup>+</sup> innervation.

Similar to KRT8<sup>+</sup> cells,  $\alpha$ -Gustducin<sup>+</sup> and CAR4<sup>+</sup> cells were also increased in RZ dKO mice compared with control mice (Figures 3G–3I). However, we observed no apparent difference in the distribution pattern of KI-67<sup>+</sup> cells in the circumvallate papillae between RZ dKO mice and control mice (Figure S3).

More importantly, we previously demonstrated that exogenous R-spondin can substitute for neuronal input for taste cell generation (Lin et al., 2021). In the present study, the pattern of taste buds we observed in RZ dKO mice was strikingly similar to what we previously observed in mice receiving R-spondin, with or without glossopharyngeal nerve transection, including the presence of ectopic taste buds in the dorsal surface and upper cleft region of the circumvallate papillae (Lin et al., 2021). Thus, either overexpression of R-spondin or knockout of *Rnf43/Znrf3*, the receptor for R-spondin with inhibitory effects, can lead to a nearly identical phenotype, suggesting that neuron-derived R-spondin and its stem/progenitor-cell-expressed RNF43/ZNRF3 receptors interact to govern taste tissue homeostasis.

(G) Immunofluorescence staining for CAR4 (green) and  $\alpha$ -Gustducin (red) of circumvallate papilla sections. Cell nuclei were counterstained with DAPI (blue). Scale bars, 50  $\mu$ m.

(H and I) Numbers of CAR4<sup>+</sup> cells (H) and  $\alpha$ -Gustducin<sup>+</sup> cells (I) show proportionate increases in type II and III taste cell with loss of *Rnf43* and *Znrf3* in circumvallate papilla. Data are presented as mean  $\pm$  SEM. \*p = 0.0122, \*\*p = 0.0074. n = 3 for each group. Each point represents a single mouse. See also Figures S2.



To determine if deletion of either *Rnf43* or *Znrf3* would produce a phenotype similar to deletion of both *Rnf43/Znrf3*, we generated *Krt5<sup>CreERT2/+</sup>;Rnf43<sup>fl/fl</sup>* and *Krt5<sup>CreERT2/+</sup>;Znrf3<sup>fl/fl</sup>* mice and examined taste tissues and lingual epithelial tissues upon tamoxifen injection (dosing scheme was the same as that for RZ dKO mice). Unlike in RZ dKO mice, in single-knockout mice no apparent taste tissue hyperplasia occurred. *Rnf43<sup>fl/fl</sup>* or *Znrf3<sup>fl/fl</sup>* mice treated with tamoxifen were used as controls. However, mild degeneration of the dorsal lingual epithelium was noted in *Rnf43* or *Znrf3* single-knockout mice (Figures 4 and 5). This set of data suggests that RNF43 and ZNRF3 have redundant roles in regulating taste tissue homeostasis and that they have similar but nonredundant roles in regulating homeostasis of dorsal lingual epithelial tissue (e.g., filiform papillae).

To further determine if the observed atrophic phenotype in the dorsal lingual epithelium of RZ dKO mice was due to potential exhaustion of stem/progenitor cells from a rapid increase in proliferation of stem/progenitor cells at the early phase (Gaillard et al., 2015), we examined taste tissues and dorsal lingual epithelial tissue (e.g., filiform papillae) 2 days after the first of the two tamoxifen injections (the second was performed 1 day after the first). No apparent changes were detected in the lingual epithelium (e.g., KI-67 staining) or in taste organs (Figure S4). Therefore, it seems that stem/progenitor cell exhaustion at the early phase in RZ dKO mice is unlikely.

### Taste cell hyperplasia remains in RZ dKO mice in the absence of nerve input

We reasoned that, if the principal activity of neuron-derived R-spondin is mediated by taste stem/progenitor-cell-expressed RNF43/ZNRF3, then removing the brake function of RNF43/ZNRF3 should render neuronal input unnecessary for taste tissue maintenance. To this end, we first performed bilateral glossopharyngeal nerve transection (GLx) of control (*Rnf43<sup>fl/fl</sup>;Znrf3<sup>fl/fl</sup>*) and *Krt5<sup>CreERT2/+</sup>;Rnf43<sup>fl/fl</sup>;Znrf3<sup>fl/fl</sup>* mice. Seven days after GLx, we induced ablation of *Rnf43* and *Znrf3* by injecting *Krt5<sup>CreERT2/+</sup>;Rnf43<sup>fl/fl</sup>;Znrf3<sup>fl/fl</sup>* mice with tamoxifen for five consecutive days, and 2 days later we harvested tissue (Figure 6A). As before, control mice received tamoxifen injection as well. Circumvallate papilla sections were then examined using antibodies against the taste cell markers KRT8,  $\alpha$ -Gustducin, and CAR4 and the taste nerve marker P2X3. As predicted, after GLx, KRT8<sup>+</sup> taste bud cells were present in RZ dKO mice but reduced dramatically in control mice (Figure 6B), demonstrating that taste bud cells regenerated in RZ dKO mice despite denervation. Counting the number of KRT8<sup>+</sup> taste buds showed more taste buds in GLx RZ dKO mice than in GLx control mice (Figure 6C). It appeared that the trench was slightly deeper in GLx RZ dKO mice than in GLx control mice, albeit not significantly (control group,  $361.8 \pm 10.61 \mu\text{m}$ ; RZ dKO

group,  $392.0 \pm 25.97 \mu\text{m}$ ; Figure 6D). Similarly, significantly more  $\alpha$ -Gustducin<sup>+</sup> and CAR4<sup>+</sup> cells were present in GLx RZ dKO mice than in GLx control mice (Figures 6E–6G). These results further support the idea that neuronal input with R-spondin regulates taste tissue homeostasis by releasing the brake function of RNF43/ZNRF3. Interestingly, when we compared the number of taste buds in GLx RZ dKO mice (from Figure 6C) and in RZ dKO mice (from Figure 3E), we noted that there were more taste buds in RZ dKO than in GLx RZ dKO mice ( $p = 0.044$ ; Figure 6H), which suggests that nerve-supplied R-spondin may interact with taste stem-cell-expressed LGR4/5/6 as well, to further promote taste cell generation in the absence of *Rnf43* and *Znrf3*.

### WNT signaling blockade prevents taste cell hyperplasia and lingual epithelium degeneration in RZ dKO mice

Mechanistically, the R-spondin-LGR4/5/6-RNF43/ZNRF3 pathway is known to augment WNT signaling (Hao et al., 2012; Koo et al., 2012, 2015), thus generally promoting stem cell activity. Because we noted the apparent opposite effects of ablation of *Rnf43/Znrf3*—promoting taste bud and taste cell expansion yet inhibiting dorsal lingual epithelium (e.g., filiform) renewal—we asked whether the WNT signaling pathway is involved in mediating the effect of RNF43/ZNRF3 in both tissues. If so, we would expect that blocking WNT signaling would inhibit both taste cell hyperplasia and lingual epithelium degeneration in RZ dKO mice. To inhibit WNT signaling, we treated RZ dKO mice (injected with tamoxifen once a day for five consecutive days) by gavaging C59 (or vehicle solution as control) on a daily basis for 7 days (Figure 7A) (Koo et al., 2015). C59 inhibits porcupine, a membrane-bound O-acyltransferase necessary for WNT activation (e.g., palmitoylation, secretion, and biological activity) (Takada et al., 2006). In RZ dKO mice treated with vehicle, the dorsal lingual surface displayed a profound phenotypic change, with a highly wrinkled and thinner surface. In contrast, in dKO mice treated with C59, the dorsal lingual surface showed normal gross morphology, comparable with control mice (*Rnf43<sup>fl/fl</sup>;Znrf3<sup>fl/fl</sup>*, receiving tamoxifen and vehicle control) (Figure 7B).

Using the antibodies against taste cell markers (KRT8,  $\alpha$ -Gustducin, and CAR4) and taste nerves (P2X3), we found that C59 reversed the phenotypic changes in taste tissue in RZ dKO mice. For instance, KRT8<sup>+</sup> ectopic taste buds (lacking P2X3 innervation) were eliminated, and taste hyperplasia was subdued in fungiform papillae (Figures 7C and 7D) and in circumvallate papillae (Figures 7E and 7F). Meanwhile, the depth of the trench was significantly decreased in RZ dKO + C59 mice compared with RZ dKO + vehicle mice, but no significant difference was noted between RZ dKO + vehicle mice and control mice (RZ dKO + vehicle group,  $422.2 \pm 10.04 \mu\text{m}$ ; RZ dKO + C59 group,  $350.6 \pm 6.238 \mu\text{m}$ ;

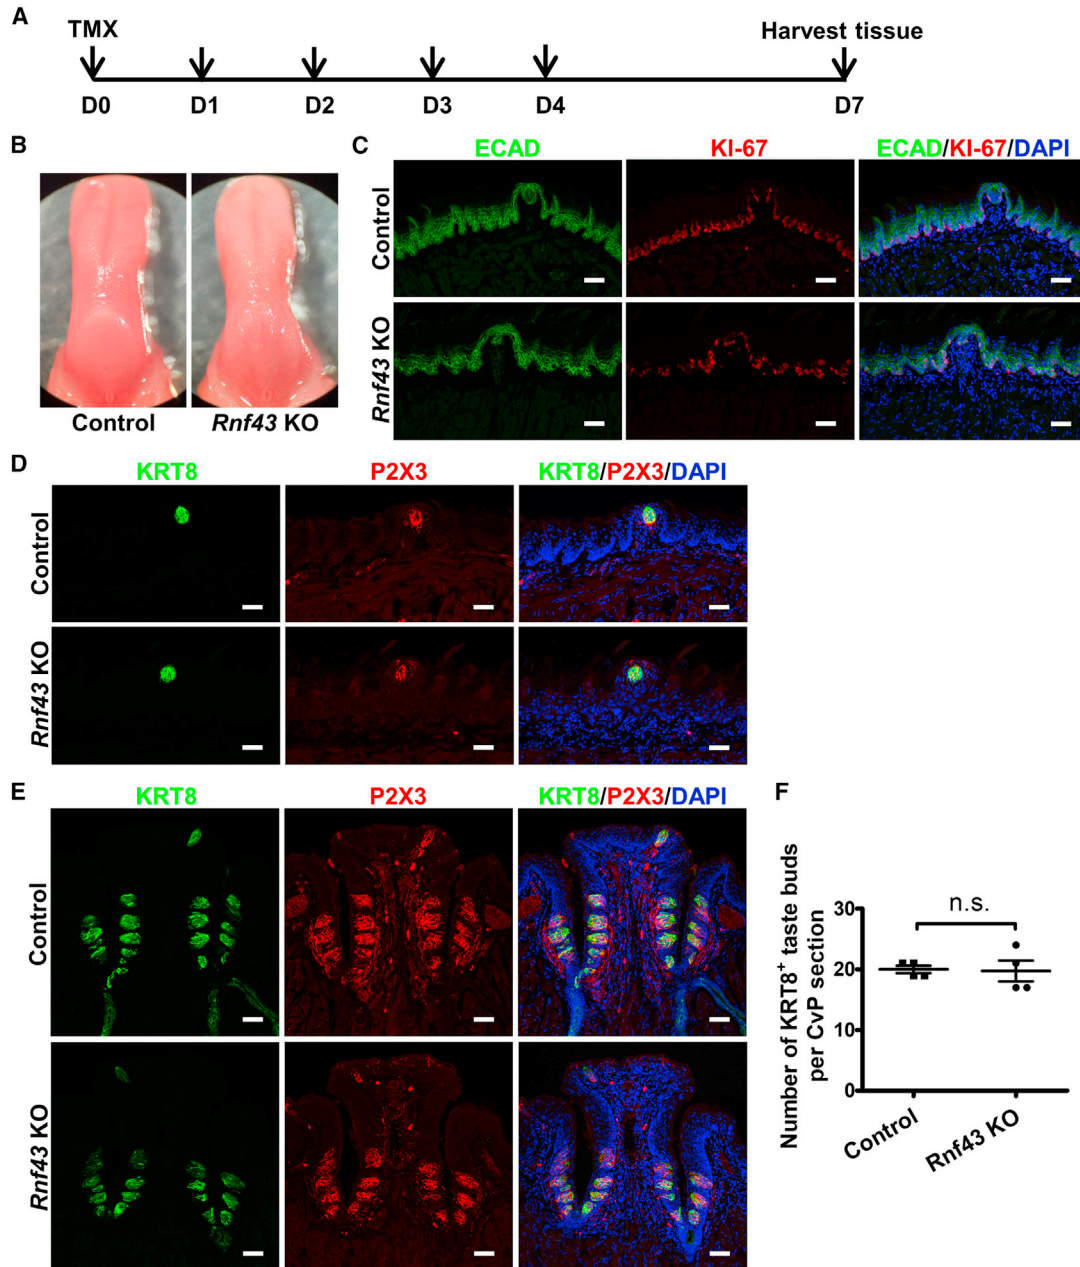

**Figure 4. Mice deficient for *Rnf43* show no detectable changes in taste tissues and mild changes in the dorsal lingual epithelium**

(A) Schematic illustration of the experimental design.

(B) Representative bright-field images of tongues collected from control and single *Rnf43* KO mice.

(C) Immunofluorescence staining of anterior tongue sections of control and single *Rnf43* KO mice for E-cadherin (ECAD, green) and KI-67 (red). Note that KI-67<sup>+</sup> cells are fewer in *Rnf43* KO mice than control mice. Cell nuclei were counterstained with DAPI (blue). Scale bars, 50  $\mu$ m.

(D and E) Immunofluorescence staining for KRT8 (green) and P2X3 (red) of anterior tongue sections (D) and circumvallate papilla sections (E) from control and single *Rnf43* KO mice. There are no apparent changes in the KRT8 and P2X3 staining patterns. Cell nuclei were counterstained with DAPI (blue). Scale bars, 50  $\mu$ m.

(F) Number of KRT8<sup>+</sup> taste buds in the circumvallate papilla from control and single *Rnf43* KO mice. Data are presented as mean  $\pm$  SEM. n.s., not significant. n = 4 for each group. Each point represents a single mouse. CvP, circumvallate papilla.

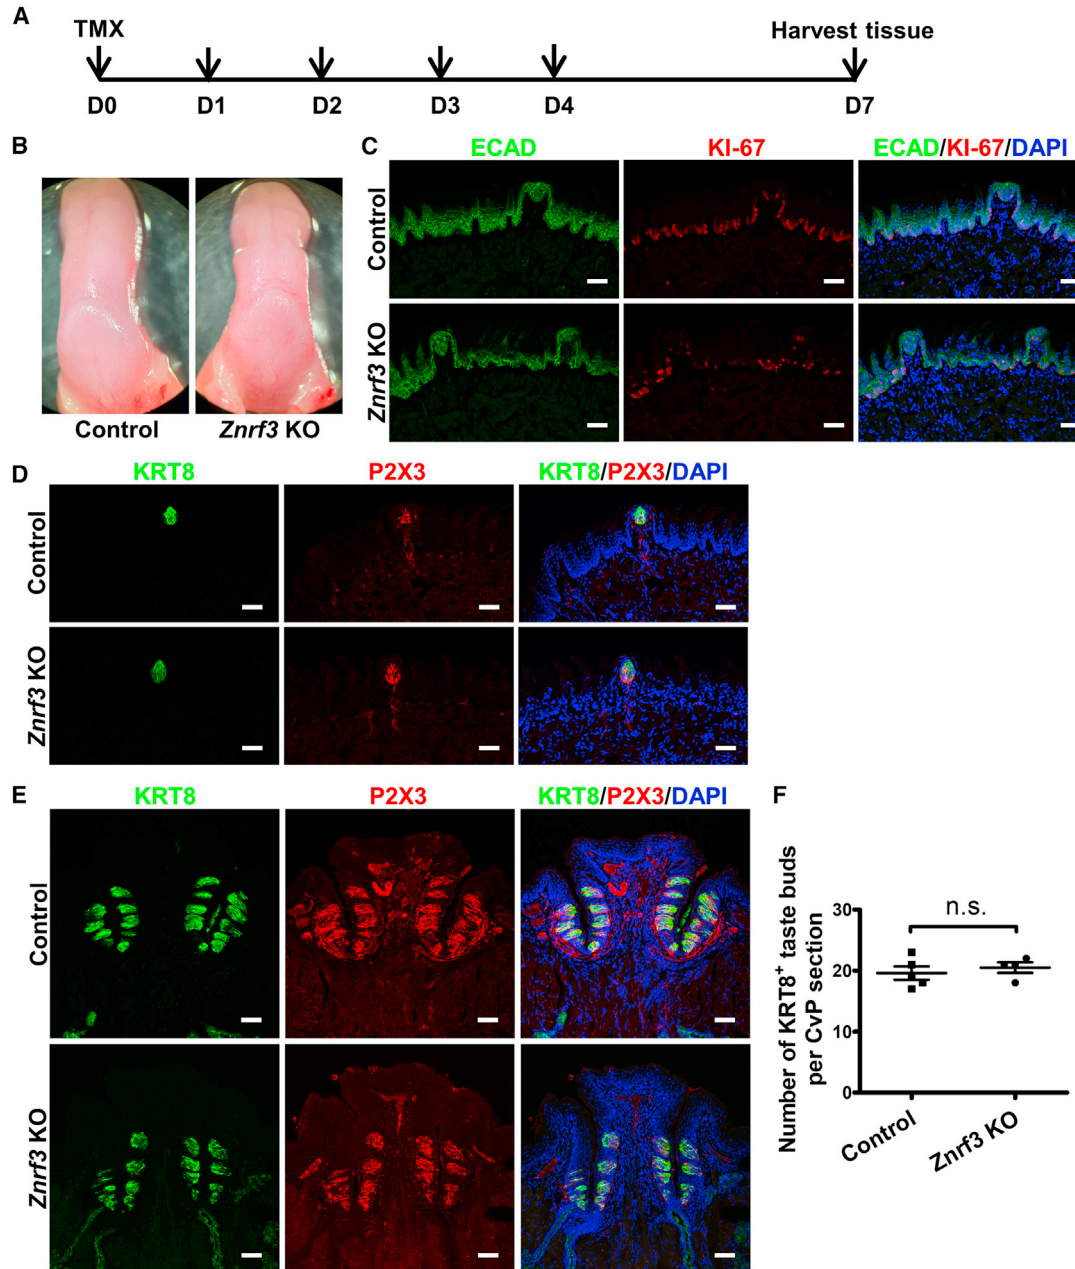

**Figure 5. Mice deficient for *Znr3* show no detectable changes in taste tissues and mild changes in the dorsal lingual epithelium**

(A) Schematic illustration of the experimental design.

(B) Representative bright-field images of tongues collected from control and single *Znr3* KO mice.

(C) Immunofluorescence staining of anterior tongue sections of control and single *Znr3* KO mice for E-cadherin (ECAD, green) and KI-67 (red). Cell nuclei were counterstained with DAPI (blue). Scale bars, 50  $\mu$ m.

(D and E) Immunofluorescence staining for KRT8 (green) and P2X3 (red) of anterior tongue sections (D) and circumvallate papilla sections (E) from control and single *Znr3* KO mice. Cell nuclei were counterstained with DAPI (blue). Scale bars, 50  $\mu$ m.

(F) Number of KRT8<sup>+</sup> taste buds in the circumvallate papilla from control and single *Znr3* KO mice. Data are presented as mean  $\pm$  SEM. n.s., not significant. n = 5 for control group and n = 4 for *Znr3* KO group. Each point represents a single mouse. CvP, circumvallate papilla.



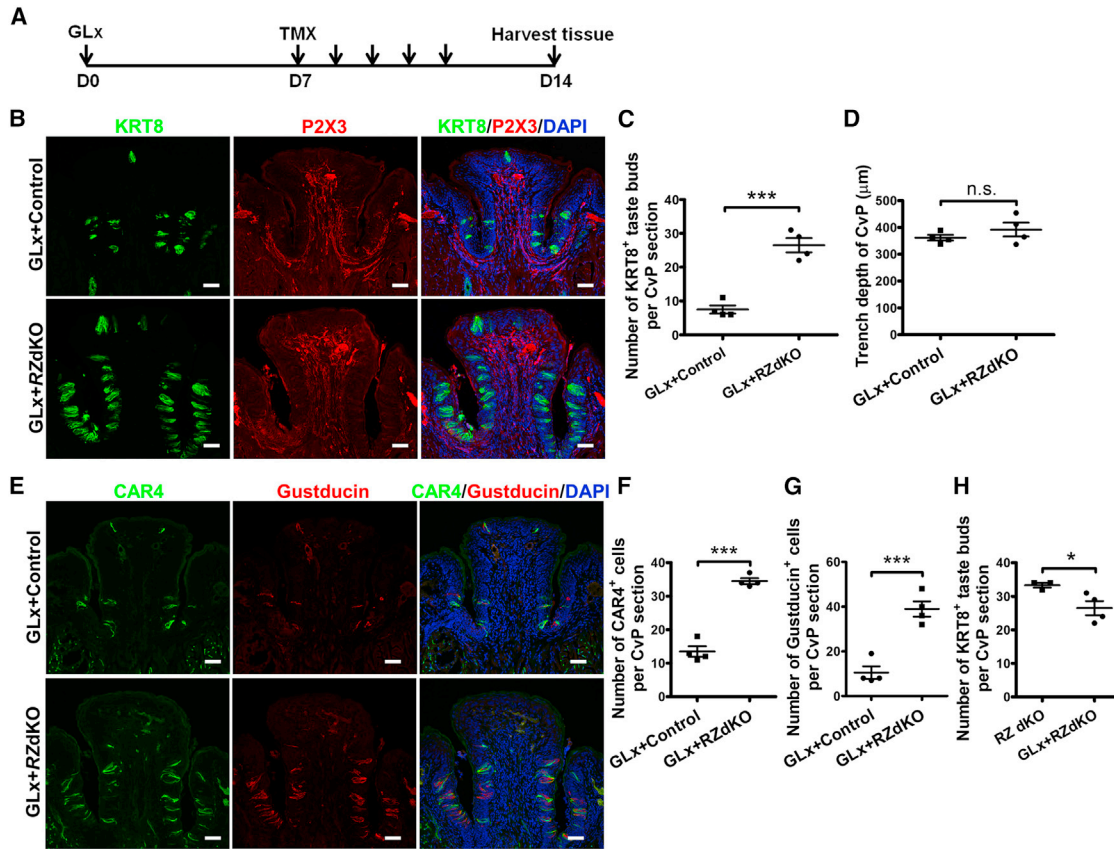

**Figure 6. *Rnf43/Znrf3* dKO promotes maintenance of taste bud after glossopharyngeal nerve transection (GLx)**

(A) Schematic illustration of the experimental design. Bilateral GLx was performed at day 0 (D0), followed by tamoxifen induction of conditional deletion of *Rnf43/Znrf3* at day 7. Tissues were collected at day 14. TMX, tamoxifen.

(B) Representative images of KRT8 and P2X3 immunostaining of circumvallate papilla sections from control and RZ dKO mice. Only a few residual KRT8<sup>+</sup> taste cells are present in control mice; in contrast, numerous KRT8<sup>+</sup> taste cells have regenerated in RZ dKO mice. Little or no P2X3 staining is present in taste tissues in either control or RZ dKO mice, although P2X3 signal is detected in the mesenchymal core. n = 4 for each group. Scale bars, 50 μm.

(C) Number of KRT8<sup>+</sup> taste buds in the circumvallate papilla from control and RZ dKO GLx mice. Data are presented as mean ± SEM. \*\*\*p = 0.0002. n = 4 for each group. Each point represents a single mouse. CvP, circumvallate papilla.

(D) Analysis of the depth of trench of the circumvallate papilla in GLx + Control and GLx + RZ dKO mice. Data are presented as mean ± SEM. n.s., not significant. n = 4 for each group.

(E) Immunofluorescence staining for CAR4 (green) and α-Gustducin (red) of circumvallate papilla sections. Few residual CAR4<sup>+</sup> or α-Gustducin<sup>+</sup> cells are present in control mice after GLx, compared with multiple CAR4<sup>+</sup> or α-Gustducin<sup>+</sup> cells in RZ dKO mice after GLx. Cell nuclei were counterstained with DAPI (blue). Scale bars, 50 μm.

(F and G) Numbers of CAR4<sup>+</sup> taste cells (F) and α-Gustducin<sup>+</sup> taste cells (G) in circumvallate papilla in RZ dKO and control mice after GLx. Data are presented as mean ± SEM. \*\*\*p < 0.0001 in (F) and p = 0.0007 in (G). n = 4 for each group. Each point represents a single mouse.

(H) Number of KRT8<sup>+</sup> taste buds in the circumvallate papilla from RZ dKO and GLx RZ dKO mice. Data are presented as mean ± SEM. \*p = 0.0437. n = 3 for RZ dKO group and n = 4 for GLx RZ dKO group. Each point represents a single mouse. CvP, circumvallate papilla.

control group, 384.5 ± 17.62 μm; Figure 7G). However, there was a trend that the trench was slightly deeper in RZ dKO mice than in control mice (also see Figure 3F). Moreover, we noted taste bud cell (e.g., α-Gustducin<sup>+</sup>, CAR4<sup>+</sup>) degeneration in circumvallate papillae in C59-treated RZ dKO mice (Figure S5), although to a lesser extent than observed after GLx nerve transection (see Figures 6E–6G). Furthermore,

proliferation of lingual epithelial stem cells was also partly rescued in anterior tongue as demonstrated by KI-67 staining (Figure S6). These results suggest that, in both dorsal lingual epithelium and taste epithelium, the activity of RNF43/ZNRF3 is mediated by WNT signaling, despite our observations of the exact opposite effects of RNF43/ZNRF3 in the two tissues.

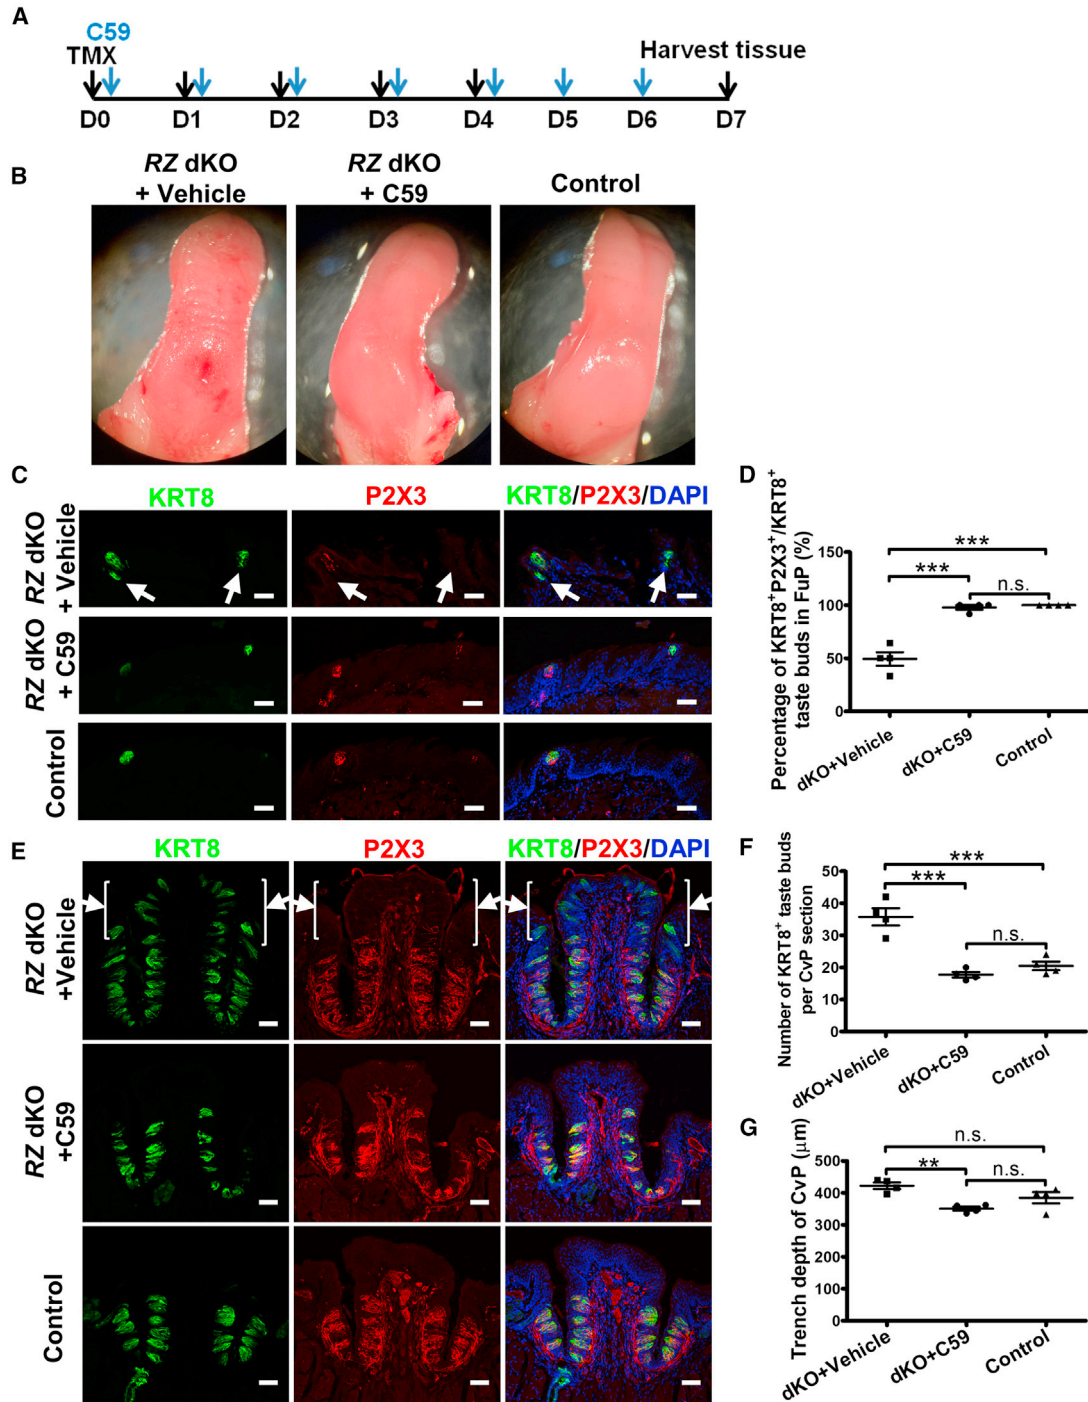

**Figure 7. WNT signaling blockade prevents taste tissue hyperplasia and lingual epithelium degeneration in RZ dKO mice**

(A) Schematic illustration of the experiment design. *Rnf43<sup>fl/fl</sup>;Znrf3<sup>fl/fl</sup>* and *Rnf43<sup>fl/fl</sup>;Znrf3<sup>fl/fl</sup>;Krt5-Cre<sup>ERT2</sup>* mice were treated with tamoxifen for five continuous days and C59 for seven continuous days, and tongue tissue was harvested at day 7. TMX, tamoxifen.

(B) Representative bright-field images of the tongue (dorsal surface) from RZ dKO mice with or without C59 treatment and from control mice. The dorsal surface of RZ dKO mice that received C59 treatment reverted to a normal, smooth appearance. n = 4 for each group.

(C) Immunofluorescence staining of KRT8 (green) and P2X3 (red) of anterior tongue sections. Ectopic taste bud cells (arrows) are present in dKO mice treated with vehicle but not in dKO mice treated with C59. Cell nuclei were counterstained with DAPI (blue). n = 4 for each group. Scale bars, 50 μm.

(legend continued on next page)



To corroborate our finding that RNF43/ZNRF3 modulates WNT signaling, we also performed immunostaining of lymphoid enhancer-binding factor 1 (LEF1), a key mediator of the WNT signaling pathway (Iwatsuki et al., 2007; Liu and Millar, 2010). As expected, increased expression of LEF1 was detected in basal cells in the circumvallate papillae in *RZ* dKO mice, but decreased expression of LEF1 was found in basal cells in the dorsal lingual epithelium (e.g., filiform papillae) (Figure S7), consistent with the idea that RNF43/ZNRF3 modulates WNT signaling in a context-dependent manner in taste and lingual epithelia. C59 treatment blunted the increase of LEF1 expression in the circumvallate papillae and the decrease of LEF1 expression partially in the dorsal lingual epithelium (Figure S7).

## DISCUSSION

In the present work, using *in situ* hybridization, we demonstrated the presence of *Rnf43/Znrf3* in basal cells in lingual epithelial tissue and taste tissue. Using a tissue-specific knockout mouse, we demonstrated that RNF43/ZNRF3 act as negative regulators to maintain taste tissue homeostasis and positive regulators to maintain lingual epithelial tissue homeostasis. Furthermore, we demonstrated that gustatory neurons regulate taste tissue homeostasis by removing the inhibitory effect of RNF43/ZNRF3 that keeps taste stem/progenitor cell quiescent, via neuron-supplied R-spondin. Mechanistically, RNF43/ZNRF3 appear to regulate WNT signaling in both taste and lingual epithelial tissues.

### RNF43/ZNRF3 as negative regulators for taste tissue homeostasis

Three pieces of evidence support RNF43/ZNRF3 as negative regulators for taste tissue homeostasis. First, epithelial-specific deletion of *Rnf43/Znrf3* in KRT5<sup>+</sup> (marks basal cells in epithelial tissues including taste tissue) cells led to taste cell hyperplasia in circumvallate papillae and fungiform papillae, as evidenced by increased numbers of taste buds and taste cells (e.g., CAR4<sup>+</sup> and  $\alpha$ -Gustducin<sup>+</sup> cells). Importantly, *de novo* generation of taste buds and taste

cells in *RZ* dKO mice occurred ectopically, without apparent innervation as determined by P2X3 staining, such as those observed in the dorsal region and upper cleft of the circumvallate papillae and satellite ectopic taste buds in fungiform papillae. However, we cannot completely exclude the possibility that existing taste cells may persist longer and thus may potentially contribute to more taste cells observed in *RZ* dKO mice. Second, neuronal input was not necessary for taste tissue renewal in *RZ* dKO mice. In normal mice, taste tissue homeostasis requires neuronal input and gustatory nerve transection leads to degeneration of taste cells and taste buds, which do not regenerate until taste fields are reinnervated. In contrast, in *RZ* dKO mice, taste cells in the circumvallate papillae regenerated even after GLx. Third, the pattern of taste bud distribution (e.g., ectopic taste buds in the dorsal surface and upper cleft of the circumvallate papillae) is virtually identical in *RZ* dKO mice (present results) and in mice receiving adenovirus encoding recombinant R-spondin, with or without nerve transection (Lin et al., 2021). In the gut system, R-spondin interacts with RNF43/ZNRF3 to neutralize their E3 ligase activity (Park et al., 2018; Yan et al., 2017). Our data suggest this is also the case in the taste system, where neuron-produced R-spondin (e.g., RSPO2) releases the braking effect exerted by RNF43/ZNRF3 to allow taste stem/progenitor cells to become active and generate taste cells and taste buds. In normal mice, taste buds are generated only in areas that receive projections from gustatory nerve fibers, the source of R-spondin. In contrast, in *RZ* dKO mice, which lack the braking exerted by RNF43/ZNRF3, taste buds are generated even in areas without gustatory nerve projections.

### Taste stem/progenitor cells

Previously, we and others have shown that LGR5 marks taste stem/progenitor cells in posterior tongue (Takeda et al., 2013; Yee et al., 2013). In anterior tongue, transcripts for *Lgr4*, *Lgr5*, and *Lgr6* can be detected, and LGR6-expressing cells give rise to taste cells as well (Ren et al., 2014). In *RZ* dKO mice, we noted taste cell hyperplasia and that multiple taste bud cells were generated ectopically. Previously we had

(D) Percentage of KRT8<sup>+</sup> taste buds that are also positive for P2X3 (i.e., innervated) in fungiform papillae (FuP). Data are presented as mean  $\pm$  SEM. \*\*\**p* < 0.0001. n.s., not significant. *n* = 4 for each group. Each point represents a single mouse.

(E) Immunofluorescence staining of KRT8 (green) and P2X3 (red) of circumvallate papilla sections. Ectopic taste bud cells (arrows) are present in the upper cleft and dorsum of the circumvallate papilla in *RZ* dKO mice treated with vehicle but not in dKO mice treated with C59. Cell nuclei were counterstained with DAPI (blue). *n* = 4 for each group. Scale bars, 50  $\mu$ m.

(F) Number of KRT8<sup>+</sup> taste buds in the circumvallate papilla in *RZ* dKO mice with or without C59 treatment and in control mice. Data are presented as mean  $\pm$  SEM. \*\*\**p* < 0.001. n.s., not significant. *n* = 4 for each group. Each point represents a single mouse. CvP, circumvallate papilla.

(G) Analysis of the depth of trench of the circumvallate papilla in *RZ* dKO mice receiving vehicle or C59 or in control mice. Data are presented as mean  $\pm$  SEM. \*\**p* = 0.0083. n.s., not significant. *n* = 4 for each group.

See also Figures S5–S7.



noted a similar pattern of taste bud cell distribution in mice receiving adenovirus encoding recombinant R-spondin, with or without nerve transection (Lin et al., 2021). The broad distribution of taste buds in these mice suggests that LGR5-negative taste/progenitor cells are present, that these cells express the E3 ligase RNF43 or ZNRF3, and that these cells are typically quiescent because of a lack of innervation.

One caveat is that we analyzed RZ dKO mice 7 days after the first injection of tamoxifen. Whether taste cell hyperplasia was long-lasting cannot be addressed using our current models, due to lethality of dKO mice (the exact cause of lethality is unknown but it could be partially due to degeneration of lingual epithelial cells) and the short-term nature of effects created by the adenovirus-based method (Wei et al., 2008). It would be intriguing to test the long-term effect of taste tissue hyperplasia, by using either another, more specific Cre driver that is selectively expressed in taste tissues, to potentially avoid lethality of ablating *Rnf43/Znrf3*, or an AAV-based protein delivery method to provide systemic delivery of recombinant R-spondin (Lahde et al., 2021).

### WNT signaling

Our data suggest that the interaction of R-spondin and RNF43/ZNRF3 plays an important role in regulating taste stem/progenitor cell activity. Whether R-spondin also regulates the activity of LGR4/5/6 to augment WNT signaling, similar to the R-spondin–LGRs–RNF43/ZNRF3 pathway in the gut, remains to be tested. However, our comparison of the number of taste buds in the circumvallate papilla between RZ dKO and GLx RZ dKO mice suggests that, aside from interacting with RNF43/ZNRF3, R-spondin may also interact with LGR4/5/6 to promote taste cell generation, as there were more taste buds in RZ dKO than in GLx RZ dKO mice. Regardless, taste cell hyperplasia induced by deleting *Rnf43/Znrf3* is apparently dependent on WNT signaling, which has been shown to play a key role in taste tissue homeostasis (Gaillard et al., 2015, 2017). We showed that inhibiting WNT signaling with C59 can abolish taste cell hyperplasia in RZ dKO mice. C59 inhibits porcupine, which is required for WNT palmitoylation, secretion, and biological activity. Therefore, as in the case of intestinal stem cells, RNF43/ZNRF3 is likely to modulate WNT signaling in taste stem/progenitor cells. A number of receptors for WNT (Frizzled receptors) are expressed in taste tissue (Hevezi et al., 2009; Ohmoto et al., 2020), as are a number of WNT molecules (Xu et al., 2017). The exact WNT-FZD pair involved in regulating taste stem/progenitor cells via autocrine or paracrine signaling is largely unknown. However, WNT10A has been shown to regulate taste and nontaste homeostasis in humans and mice (Xu et al., 2017). It is also plausible that the system has built-in redundancy,

such that all these pairs can regulate taste stem/progenitor cell activity; thus, simply removing one FZD or WNT may not be sufficient to detect any phenotypic changes in taste tissue homeostasis. Nevertheless, C59 inhibits porcupine, thereby inhibiting WNT signaling triggered by all WNTs. As a consequence, it not only blocks the effect observed in RZ dKO but also appears to suppress normal WNT activity, reducing numbers of taste cells by slowing down stem cell activity. We speculate that longer treatment of mice with C59 (beyond the 7 days in this study) may lead to more severe degeneration of taste buds.

### RNF43/ZNRF3 is required for maintaining dorsal lingual epithelial tissue (e.g., filiform papillae) homeostasis

RNF43 and ZNRF3 are known as negative regulators of the WNT signaling pathway for intestinal stem cells (Koo et al., 2012), liver zonation (Planas-Paz et al., 2016), adrenal homeostasis (Basham et al., 2019), and now taste stem cells (present results). Remarkably, we found that, in dorsal lingual epithelium, ablating *Rnf43/Znrf3* led not to lingual epithelial cell hyperplasia but, instead, to degeneration of lingual epithelial tissue. The dorsal lingual epithelium is covered with filiform (nontaste) papillae, whereas the ventral lingual epithelium is not. Therefore, it appears that filiform papilla renewal requires RNF43/ZNRF3. C59 can partially ameliorate degeneration of dorsal lingual epithelial tissue induced by loss of *Rnf43/Znrf3*, suggesting activating WNT signaling may lead to degeneration of lingual epithelium. However, we cannot rule out the possibility that in this context, or even in taste tissues, C59 targets other molecules instead of porcupine. Interestingly, the expression of LEF1, an indicator of WNT signaling (Iwatsuki et al., 2007; Liu and Millar, 2010), was decreased in the dorsal lingual epithelium in the absence of *Rnf43/Znrf3*, which argues against the idea that activating WNT signaling leads to degeneration of lingual epithelium, instead suggesting that activation of WNT signaling in the dorsal lingual epithelium (i.e., filiform papillae) requires the presence of RNF43/ZNRF3. Paradoxically, C59 can partially reverse the decreased expression of LEF1 after ablating *Rnf43/Znrf3*. However, as described above, this could be mediated by the blockade of either porcupine or other molecules. Regardless, given the strong phenotype we observed in this study, further study is warranted to understand the molecular basis of the context-dependent effects of RNF43/ZNRF3 on WNT signaling in dorsal lingual epithelium (e.g., filiform papillae) and in taste tissues. Our ongoing proteomic work may lead to identification of potentially distinct target molecules (e.g., different WNT signaling elements) of the two E3 ligases RNF43/ZNRF3 in the dorsal lingual epithelium and in taste tissues.



## EXPERIMENTAL PROCEDURES

### Mice

The *Rnf43<sup>fl/fl</sup>;Znrf3<sup>fl/fl</sup>* mice were supplied by Drs. Hans Clevers and Bon-Kyoung Koo and maintained at the Monell Center. B6N.129S6(Cg)-*Krt5<sup>tm1.1(cre/ERT2)Blh</sup>/J* (*Krt5<sup>CreERT2/+</sup>*; stock no. 029155) mice and C57BL/6 (stock no. 000664) mice were purchased from Jackson Laboratory. All transgenic mice were maintained on the C57BL/6 genetic background. Mice between 8 and 10 weeks old of both sexes were used for analyses. All experiments were performed under National Institutes of Health guidelines for the care and use of animals in research and approved by the Institutional Animal Care and Use Committee of the Monell Chemical Senses Center.

### Tamoxifen and C59 administration

Conditional *Rnf43/Znrf3* double-knockout (RZ dKO) mice were generated by crossing *Rnf43<sup>fl/fl</sup>;Znrf3<sup>fl/fl</sup>* mice with *Krt5-Cre<sup>ERT2</sup>* mice. The Cre enzyme was induced by intraperitoneal injection of tamoxifen (100 mg/kg body weight; Sigma Aldrich, no. T5648) for five consecutive days, unless specified otherwise. Tamoxifen was dissolved in corn oil at a concentration of 20 mg/mL by shaking overnight at 37°C. The porcupine inhibitor C59 (50 mg/kg body weight; Cayman Chemical, no. 16644) was mixed with 0.5% methylcellulose and 0.1% Tween 80 and then administered by oral gavage for seven consecutive days.

### Glossopharyngeal nerve transection

Mice were anesthetized with continuous 2% isoflurane and placed on isothermal heating pads. GLx was performed following procedures described previously (Lin et al., 2021). Details are provided in the supplemental experimental procedures.

### Tissue preparation

Mice were euthanized on the indicated days. Tongues were dissected, fixed in 4% (wt/vol) paraformaldehyde for 2 h, cryoprotected with 30% sucrose overnight, and embedded in the frozen O.C.T. compound (Sakura, no. 4583). Cryosections (10 μm) were prepared using a Leica CM3050 S cryostat (Leica Biosystems) and mounted on tissue-adhesive-coated glass slides (Electron Microscopy Sciences, no. 71869-40).

### In situ hybridization

*In situ* hybridization was carried out as described previously (Lin et al., 2021). Additional details are provided in the supplemental experimental procedures.

### Tongue epithelium peeling

The procedure was performed following the description previously (Lu et al., 2018). Additional details are provided in the supplemental experimental procedures.

### Immunostaining and imaging

Immunostaining was performed essentially as described previously (Lin et al., 2021). Details are provided in the supplemental experimental procedures.

### Cell counting

Taste buds were identified as onion-like structures with KRT8<sup>+</sup> immunostaining. Type II or III taste cells were identified as visible elongated cell profiles with a clear nucleus with α-Gustducin<sup>+</sup> or CAR4<sup>+</sup> immunostaining. Details are provided in the supplemental experimental procedures.

### RNA isolation and quantitative PCR

Total RNA was extracted from peeled tongue epithelium using the PureLink RNA Micro Kit (Thermo Fisher, no. 12183-016) plus TRIzol (Life Technologies, no. 15596-026) according to the manufacturers' directions. Details are provided in the supplemental experimental procedures.

### Statistical analyses

Data are shown as the mean ± SEM. GraphPad Prism 5 software was used for the graphs and statistical analyses. Student's t test was used to compare difference between two groups, and one-way ANOVA followed by Tukey's test was used to determine differences among three groups. Chi-square test was used to compare difference of taste bud innervation in fungiform papillae.

## SUPPLEMENTAL INFORMATION

Supplemental information can be found online at <https://doi.org/10.1016/j.stemcr.2021.12.002>.

## AUTHOR CONTRIBUTIONS

C.L. and P.J. designed the experiments. C.L., X.L., J.Y., R.X., M.Z., and I.M. performed the experiments. C.L., X.L., R.X., I.M., and P.J. analyzed data and interpreted results of experiments. Y.V.Z., H.W., R.F.M., B.-K.K., and H.C. contributed reagents. P.J. conceived of the work and wrote the manuscript with C.L.

## CONFLICTS OF INTEREST

The authors declare no competing interests, with the exception of H.C., who is the inventor on several patents related to organoid technology; cofounder of Surrozen, D1Med, and Xilis; member of the board of directors of Roche/Genentech; and Scientific Advisory Board (SAB) member of Volastra, Decibel, and Merus; his full disclosure is given at <https://www.uu.nl/staff/JCClevers/>.

## ACKNOWLEDGMENTS

This work was supported by NIH grants DC010842 (to P.J.), DC018627 (to P.J.), DC015491 (to I.M.), and G20 OD020296 (to Danielle R. Reed). Imaging was performed at the Cell and Developmental Biology Core at the University of Pennsylvania and at the Monell Histology and Cellular Localization Core, which was supported in part by NIH National Institute on Deafness and Other Communication Disorders Core Grant DC011735 (to R.F.M.). The graphical abstract was created with BioRender.com.

Received: April 27, 2021

Revised: December 6, 2021

Accepted: December 7, 2021

Published: January 6, 2022



## REFERENCES

- Aihara, E., Mahe, M.M., Schumacher, M.A., Matthis, A.L., Feng, R., Ren, W., Noah, T.K., Matsu-ura, T., Moore, S.R., Hong, C.I., et al. (2015). Characterization of stem/progenitor cell cycle using murine circumvallate papilla taste bud organoid. *Sci. Rep.* *5*, 17185. <https://doi.org/10.1038/srep17185>.
- Bachmanov, A.A., and Beauchamp, G.K. (2007). Taste receptor genes. *Annu. Rev. Nutr.* *27*, 389–414. <https://doi.org/10.1146/annurev.nutr.26.061505.111329>.
- Barlow, L.A., and Klein, O.D. (2015). Developing and regenerating a sense of taste. *Curr. Top. Dev. Biol.* *111*, 401–419. <https://doi.org/10.1016/bs.ctdb.2014.11.012>.
- Basham, K.J., Rodriguez, S., Turcu, A.F., Lerario, A.M., Logan, C.Y., Rysztak, M.R., Gomez-Sanchez, C.E., Breault, D.T., Koo, B.K., Clevers, H., et al. (2019). A ZNRF3-dependent Wnt/beta-catenin signaling gradient is required for adrenal homeostasis. *Genes Dev.* *33*, 209–220. <https://doi.org/10.1101/gad.317412.118>.
- Beidler, L.M., and Smallman, R.L. (1965). Renewal of cells within taste buds. *J. Cell Biol.* *27*, 263–272.
- Chaudhari, N., and Roper, S.D. (2010). The cell biology of taste. *J. Cell Biol.* *190*, 285–296. <https://doi.org/10.1083/jcb.201003144>.
- Cheal, M., and Oakley, B. (1977). Regeneration of fungiform taste buds: temporal and spatial characteristics. *J. Comp. Neurol.* *172*, 609–625. <https://doi.org/10.1002/cne.901720405>.
- de Lau, W., Barker, N., Low, T.Y., Koo, B.K., Li, V.S., Teunissen, H., Kujala, P., Haegerbarth, A., Peters, P.J., van de Wetering, M., et al. (2011). Lgr5 homologues associate with Wnt receptors and mediate R-spondin signalling. *Nature* *476*, 293–297. <https://doi.org/10.1038/nature10337>.
- de Lau, W., Peng, W.C., Gros, P., and Clevers, H. (2014). The R-spondin/Lgr5/Rnf43 module: regulator of Wnt signal strength. *Genes Dev.* *28*, 305–316. <https://doi.org/10.1101/gad.235473.113>.
- Gaillard, D., Bowles, S.G., Salcedo, E., Xu, M., Millar, S.E., and Barlow, L.A. (2017). beta-catenin is required for taste bud cell renewal and behavioral taste perception in adult mice. *PLoS Genet.* *13*, e1006990. <https://doi.org/10.1371/journal.pgen.1006990>.
- Gaillard, D., Xu, M., Liu, F., Millar, S.E., and Barlow, L.A. (2015). Beta-catenin signaling biases multipotent lingual epithelial progenitors to differentiate and acquire specific taste cell fates. *PLoS Genet.* *11*, e1005208. <https://doi.org/10.1371/journal.pgen.1005208>.
- Guth, L. (1958). Taste buds on the cat's circumvallate papilla after reinnervation by glossopharyngeal, vagus, and hypoglossal nerves. *Anatomical Rec.* *130*, 25–37. <https://doi.org/10.1002/ar.1091300104>.
- Hao, H.X., Xie, Y., Zhang, Y., Charlat, O., Oster, E., Avello, M., Lei, H., Mickanin, C., Liu, D., Ruffner, H., et al. (2012). ZNRF3 promotes Wnt receptor turnover in an R-spondin-sensitive manner. *Nature* *485*, 195–200. <https://doi.org/10.1038/nature11019>.
- Hevezi, P., Moyer, B.D., Lu, M., Gao, N., White, E., Echeverri, F., Kalabat, D., Soto, H., Laita, B., Li, C., et al. (2009). Genome-wide analysis of gene expression in primate taste buds reveals links to diverse processes. *PLoS One* *4*, e6395. <https://doi.org/10.1371/journal.pone.0006395>.
- Iwatsuki, K., Liu, H.X., Gronder, A., Singer, M.A., Lane, T.F., Groschedl, R., Mistretta, C.M., and Margolskee, R.F. (2007). Wnt signaling interacts with Shh to regulate taste papilla development. *Proc. Natl. Acad. Sci. U S A* *104*, 2253–2258. <https://doi.org/10.1073/pnas.0607399104>.
- Koo, B.K., Spit, M., Jordens, I., Low, T.Y., Stange, D.E., van de Wetering, M., van Es, J.H., Mohammed, S., Heck, A.J., Maurice, M.M., and Clevers, H. (2012). Tumour suppressor RNF43 is a stem-cell E3 ligase that induces endocytosis of Wnt receptors. *Nature* *488*, 665–669. <https://doi.org/10.1038/nature11308>.
- Koo, B.K., van Es, J.H., van den Born, M., and Clevers, H. (2015). Porcupine inhibitor suppresses paracrine Wnt-driven growth of Rnf43;Znrf3-mutant neoplasia. *Proc. Natl. Acad. Sci. U S A* *112*, 7548–7550. <https://doi.org/10.1073/pnas.1508113112>.
- Lahde, M., Heino, S., Hogstrom, J., Kaijalainen, S., Anisimov, A., Flanagan, D., Kallio, P., Leppanen, V.M., Ristimaki, A., Ritvos, O., et al. (2021). Expression of R-spondin 1 in Apc(min/+) mice suppresses growth of intestinal adenomas by altering Wnt and transforming growth factor beta signaling. *Gastroenterology* *160*, 245–259. <https://doi.org/10.1053/j.gastro.2020.09.011>.
- Lin, X., Lu, C., Ohmoto, M., Choma, K., Margolskee, R.F., Matsu-moto, I., and Jiang, P. (2021). R-spondin substitutes for neuronal input for taste cell regeneration in adult mice. *Proc. Natl. Acad. Sci. U S A* *118*. <https://doi.org/10.1073/pnas.2001833118>.
- Liu, F., and Millar, S.E. (2010). Wnt/beta-catenin signaling in oral tissue development and disease. *J. Dent Res.* *89*, 318–330. <https://doi.org/10.1177/0022034510363373>.
- Lu, W.-J., Mann, R.K., Nguyen, A., Bi, T., Silverstein, M., Tang, J.Y., Chen, X., and Beachy, P.A. (2018). Neuronal delivery of Hedgehog directs spatial patterning of taste organ regeneration. *Proc. Natl. Acad. Sci. U S A* *115*, E200–E209. <https://doi.org/10.1073/pnas.1719109115>.
- Ohmoto, M., Lei, W., Yamashita, J., Hirota, J., Jiang, P., and Matsu-moto, I. (2020). SOX2 regulates homeostasis of taste bud cells and lingual epithelial cells in posterior tongue. *PLoS One* *15*, e0240848. <https://doi.org/10.1371/journal.pone.0240848>.
- Olmsted, J.M.D. (1921). Effects of cutting the lingual nerve of the dog. *J. Comp. Neurol.* *33*, 149–154. <https://doi.org/10.1002/cne.900330204>.
- Park, S., Cui, J., Yu, W., Wu, L., Carmon, K.S., and Liu, Q.J. (2018). Differential activities and mechanisms of the four R-spondins in potentiating Wnt/beta-catenin signaling. *J. Biol. Chem.* *293*, 9759–9769. <https://doi.org/10.1074/jbc.RA118.002743>.
- Perea-Martinez, I., Nagai, T., and Chaudhari, N. (2013). Functional cell types in taste buds have distinct longevities. *PLoS ONE* *8*, e53399. <https://doi.org/10.1371/journal.pone.0053399>.
- Planas-Paz, L., Orsini, V., Boulter, L., Calabrese, D., Pikiolek, M., Nigsch, F., Xie, Y., Roma, G., Donovan, A., Marti, P., et al. (2016). The RSP0-LGR4/5-ZNRF3/RNF43 module controls liver zonation and size. *Nat. Cell Biol.* *18*, 467–479. <https://doi.org/10.1038/ncb3337>.
- Ren, W., Aihara, E., Lei, W., Gheewala, N., Uchiyama, H., Margol-skee, R.F., Iwatsuki, K., and Jiang, P. (2017). Transcriptome analyses of taste organoids reveal multiple pathways involved in taste cell

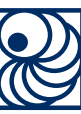

generation. *Sci. Rep.* 7, 4004. <https://doi.org/10.1038/s41598-017-04099-5>.

Ren, W., Lewandowski, B.C., Watson, J., Aihara, E., Iwatsuki, K., Bachmanov, A.A., Margolskee, R.F., and Jiang, P. (2014). Single Lgr5- or Lgr6-expressing taste stem/progenitor cells generate taste bud cells ex vivo. *Proc. Natl. Acad. Sci. U S A* 111, 16401–16406. <https://doi.org/10.1073/pnas.1409064111>.

Takada, R., Satomi, Y., Kurata, T., Ueno, N., Norioka, S., Kondoh, H., Takao, T., and Takada, S. (2006). Monounsaturated fatty acid modification of Wnt protein: its role in Wnt secretion. *Dev. Cell* 11, 791–801. <https://doi.org/10.1016/j.devcel.2006.10.003>.

Takeda, N., Jain, R., Li, D., Li, L., Lu, M.M., and Epstein, J.A. (2013). Lgr5 identifies progenitor cells capable of taste bud regeneration after injury. *PLoS One* 8, e66314. <https://doi.org/10.1371/journal.pone.0066314>.

Vintschgau, M.V., and Hönigschmied, J. (1876). Nervus Glosso-pharyngeus und Schmeckbecker. *Arch. Ges. Physiol.* 14, 443–448.

Wei, K., Kuhnert, F., and Kuo, C.J. (2008). Recombinant adenovirus as a methodology for exploration of physiologic functions of growth factor pathways. *J. Mol. Med. (Berl)* 86, 161–169. <https://doi.org/10.1007/s00109-007-0261-7>.

Xu, M., Horrell, J., Snitow, M., Cui, J., Gochnauer, H., Syrett, C.M., Kallish, S., Seykora, J.T., Liu, F., Gaillard, D., et al. (2017). WNT10A mutation causes ectodermal dysplasia by impairing progenitor cell proliferation and KLF4-mediated differentiation. *Nat. Commun.* 8, 15397. <https://doi.org/10.1038/ncomms15397>.

Yan, K.S., Janda, C.Y., Chang, J., Zheng, G.X.Y., Larkin, K.A., Luca, V.C., Chia, L.A., Mah, A.T., Han, A., Terry, J.M., et al. (2017). Non-equivalence of Wnt and R-spondin ligands during Lgr5(+) intestinal stem-cell self-renewal. *Nature* 545, 238–242. <https://doi.org/10.1038/nature22313>.

Yee, K.K., Li, Y., Redding, K.M., Iwatsuki, K., Margolskee, R.F., and Jiang, P. (2013). Lgr5-EGFP marks taste bud stem/progenitor cells in posterior tongue. *Stem Cells* 31, 992–1000. <https://doi.org/10.1002/stem.1338>.

**Supplemental Information**

**RNF43/ZNRF3 negatively regulates taste tissue homeostasis and positively regulates dorsal lingual epithelial tissue homeostasis**

**Chanyi Lu, Xiaoli Lin, Jumpei Yamashita, Ranhui Xi, Minliang Zhou, Yali V. Zhang, Hong Wang, Robert F. Margolskee, Bon-Kyoung Koo, Hans Clevers, Ichiro Matsumoto, and Peihua Jiang**



## Supplemental Figures

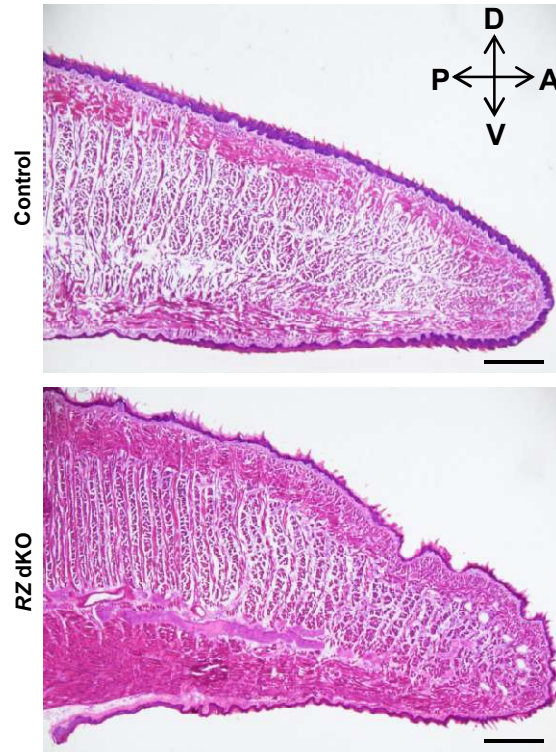

**Figure S1 (related to Figure 2). Representative images of hematoxylin and eosin staining of anterior tongue sections from control and *RZ* dKO mice (large view).** Note the thinner dorsal lingual epithelium (i.e., filiform papillae) in *RZ* dKO mice.  $n=3$  for each group. Scale bars, 500  $\mu\text{m}$ .

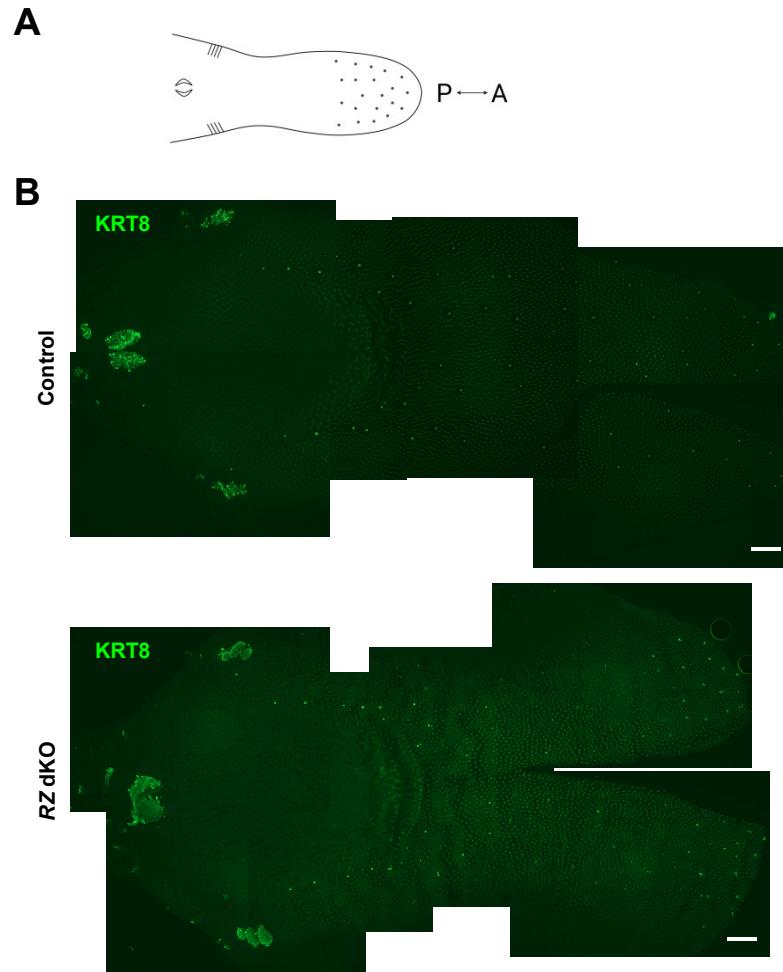

**Figure S2 (related to Figure 3B). Representative images of KRT8 immunostaining of whole-mount tongue epithelium.**

(A) Schematic of the tongue epithelium (P, posterior; A, anterior).

(B) Images stitched manually to show the whole field of tongue surface (left to right corresponds to posterior to anterior tongue). Note the presence of the circumvallate papilla (middle) and foliate papillae (lateral) in the posterior tongue. n=3 for each group. Scale bars, 500  $\mu$ m.

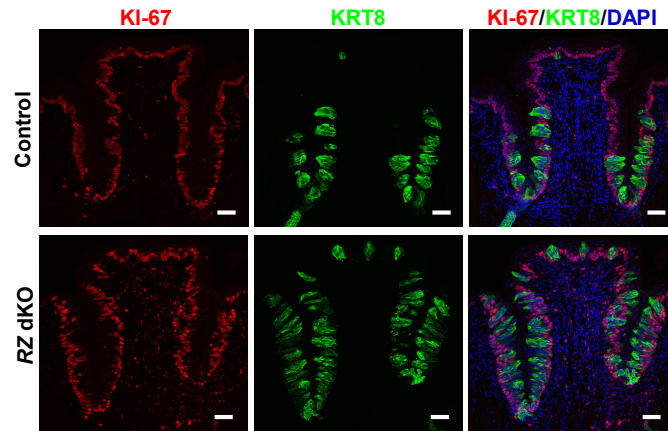

**Figure S3. KI-67 staining in the circumvallate papilla in control and RZ dKO mice.** Representative images of KI-67 and KRT8 immunostaining of circumvallate papilla sections. No apparent changes are apparent in the distribution pattern of KI-67<sup>+</sup> proliferating basal cells in RZ dKO mice compared to control mice. Cell nuclei were counterstained with DAPI (blue). n=3 for each group. Scale bars, 50  $\mu$ m.

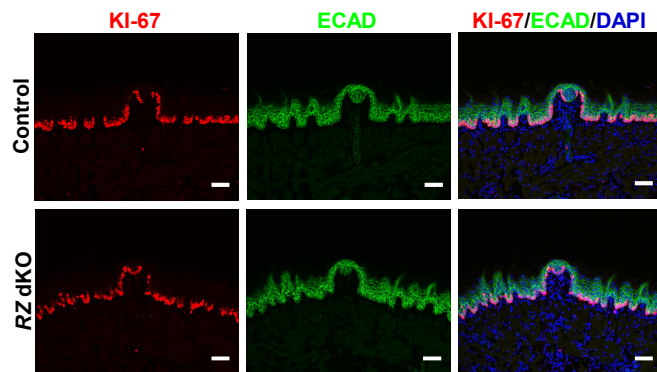

**Figure S4. KI-67 staining of the anterior tongue epithelium section (including fungiform papilla and filiform papillae) in control (n=2) and RZ dKO mice (n=4) at day 2 after tamoxifen induction.**

Representative images of KI-67 and ECAD immunostaining of anterior dorsal epithelium sections. No apparent changes are detected in the distribution pattern of KI-67<sup>+</sup> proliferating basal cells in RZ dKO mice compared with control mice. Cell nuclei were counterstained with DAPI (blue). Scale bars, 50  $\mu$ m.

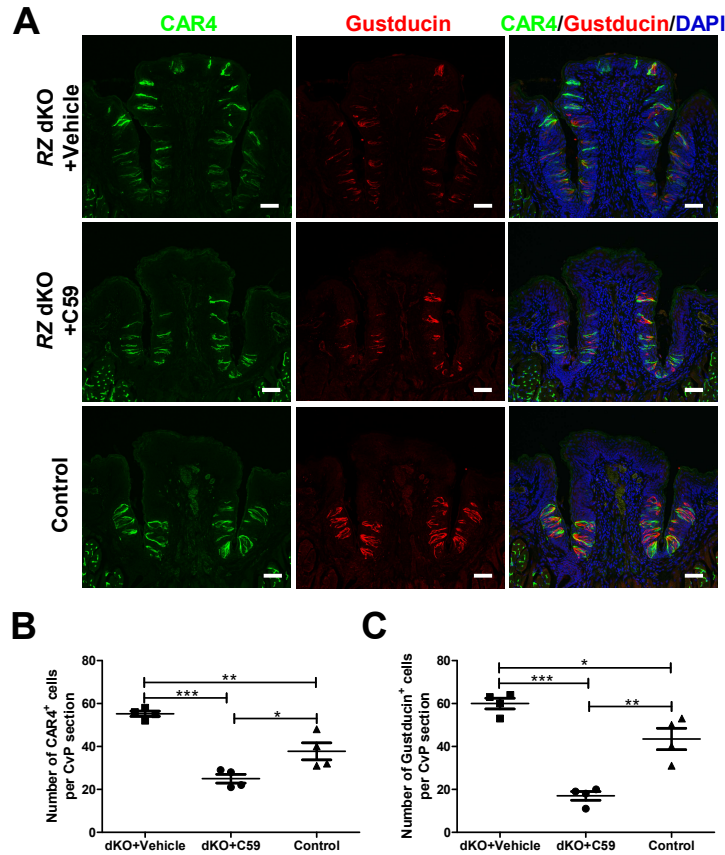

**Figure S5 (related to Figure 7). WNT signaling blockade prevents the increase of CAR4<sup>+</sup> type III and α-Gustducin<sup>+</sup> type II taste cells in the circumvallate papilla in RZ dKO mice.**

**(A) Immunofluorescence** staining for CAR4 (green) and α-Gustducin (red) of circumvallate papilla sections from RZ dKO mice receiving vehicle or C59 or from control mice. Taste bud cells are frequently present in the upper cleft and dorsum of the circumvallate papilla in RZ dKO mice receiving vehicle but not in RZ dKO mice receiving C59 or in control mice. Cell nuclei were counterstained with DAPI (blue). Scale bars, 50 μm.

**(B, C)** Numbers of CAR4<sup>+</sup> taste cells **(B)** and α-Gustducin<sup>+</sup> taste cells **(C)** in circumvallate papilla (CvP) in RZ dKO mice receiving vehicle or C59 or in control mice. Data are presented as mean ± SEM. \* p<0.05. \*\* p<0.01. \*\*\* p<0.001. n=4 for each group. Each point represents a single mouse.

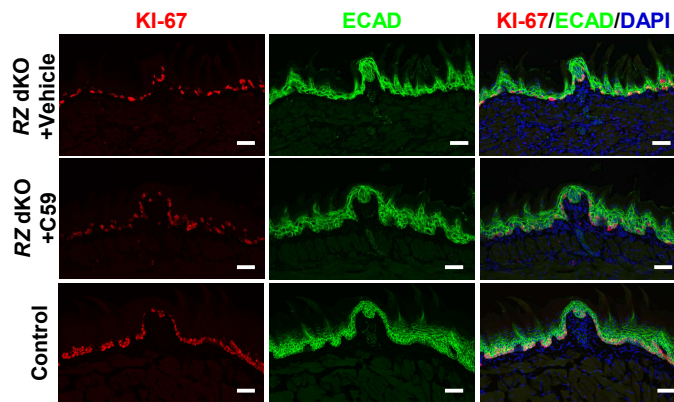

**Figure S6 (related to Figure 7). Blocking WNT signaling partly rescues decreased proliferation in lingual epithelium in RZ dKO mice.**

Immunofluorescence staining of KI-67 (red) and E-cadherin (ECAD, green) of anterior tongue sections from RZ dKO mice receiving vehicle or C59 or from control mice. Cell nuclei were counterstained with DAPI (blue). n=4 for each group. Scale bars, 50 μm.

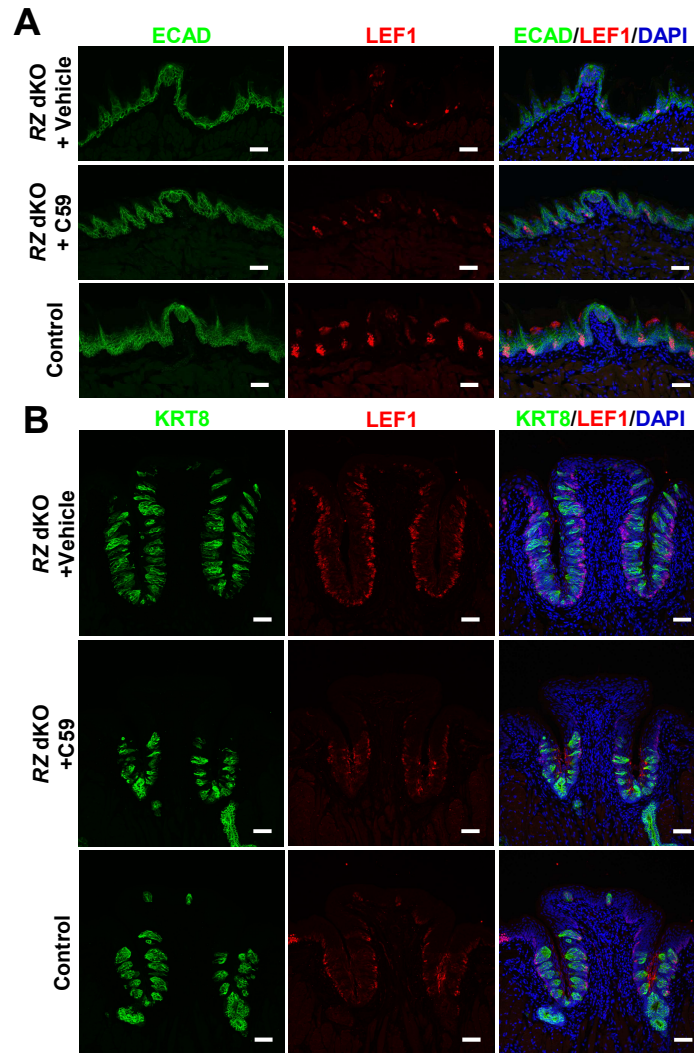

**Figure S7 (related to Figure 7). LEF1 expression in lingual epithelium and circumvallate papilla.**

Immunofluorescence staining of E-cadherin (ECAD, green) and LEF1 (red) of anterior tongue sections (**A**) and KRT8 (green) and LEF1 (red) of circumvallate papilla sections (**B**) from RZ dKO mice receiving vehicle or C59 or from control mice. Cell nuclei were counterstained with DAPI (blue). n=4 for each group. Scale bars, 50  $\mu$ m.

## Supplemental Experimental Procedures

### Glossopharyngeal nerve transection

An incision was made along the ventral neck midline; the digastric muscle was retracted to expose the glossopharyngeal nerve, identified as coursing anterior and lateral to the internal carotid artery; and bilateral transection was performed.

### *In situ* hybridization

Tongues were harvested from C57BL/6 mice and embedded in the O.C.T. compound (Sakura, no. 4583). Fresh-frozen sections 8  $\mu$ m thick were prepared using a Leica CM1900 cryostat (Leica Biosystems). In brief, digoxigenin-labeled antisense RNAs were used as probes after fragmentation of linearized complete coding sequence of *Rnf43* or *Znrf3* under alkaline conditions. Fresh-frozen sections were fixed with 4% paraformaldehyde, treated with diethylpyrocarbonate, prehybridized with salmon sperm DNA for 2 h at 58°C, and hybridized with fragmented antisense riboprobes (~150 bases) overnight at 58°C after alkaline fragmentation. After hybridization, the sections were washed in 0.2 $\times$  SSC at 58°C and blocked with 0.5% blocking reagent (Roche Diagnostics) in Tris-buffered saline. The sections were then incubated with alkaline phosphatase-conjugated anti-digoxigenin primary antibody (1:500, Roche Diagnostics) for 1 h, followed by overnight incubation with chromogenic substrates 4-nitro blue tetrazolium chloride/5-bromo-4-chloro-3-indolyl-phosphate. Images were acquired with a Nikon Microphot microscope.

### Tongue epithelium peeling

Tongues from *Rnf43<sup>fl/fl</sup>;Znrf3<sup>fl/fl</sup>;Krt5<sup>CreERT2/+</sup>* and *Rnf43<sup>fl/fl</sup>;Znrf3<sup>fl/fl</sup>* mice were injected with ~0.5 mL of an enzyme mixture containing dispase II (4 mg/mL; Roche, no. 0494207800) and collagenase A (2 mg/mL; Roche, no. 10103578001) in Tyrode's solution (145 mM NaCl, 5 mM KCl, 10 mM Hepes, 5 mM NaHCO<sub>3</sub>, 10 mM pyruvate, 10 mM glucose) for 15 min at 37 °C. Tongue epithelium was peeled gently from the connective tissue underneath.

### Immunostaining and imaging

Slides or peeled epithelium were washed three times in PBS and blocked in SuperBlock™ Blocking Buffer (Thermo Scientific, no. 37515) containing 2% donkey serum and 0.3% Triton X-100 for 1 h at room temperature. Primary antibodies were incubated overnight at 4°C, and secondary antibodies were applied for 1.5 h at room temperature. Primary antibodies were rat anti-KRT8 (Developmental Studies Hybridoma Bank, no. TROMA-I; 1:10), rabbit anti-P2X3 (Alomone Labs, no. APR-016; 1:1000), goat anti-CAR4 (R&D, no. AF2414; 1:100), rabbit anti- $\alpha$ -Gustducin (Santa Cruz, no. sc-395; 1:100), goat anti-E-cadherin (R&D Systems, no. AF648; 1:500), rabbit anti-LEF1 (Cell Signaling Technology, no. 2230S; 1:200), and rabbit anti-KI-67 antibody (Novus, no. NB600-1252; 1:100). For immunostaining with anti-KI-67 antibody, the sections were treated in a preheated target retrieval solution (pH 9) (Dako, no. S2367) at 80°C for 20 min for antigen retrieval before blocking. Secondary antibodies (1:500) included donkey anti-rat Alexa Fluor 488 (Molecular Probes, no. A-21208), donkey anti-rabbit Alexa Fluor 555 (Abcam, no. ab150074), and donkey anti-goat Alexa Fluor 488 (Abcam, no. ab150129). Images were captured by a Leica TCS SP8 confocal microscope at the Cell and Developmental Biology Core at the University of Pennsylvania or by a Nikon ECLIPSE 80i and Olympus SZ61 microscope at Monell Chemical Senses Center. Confocal images were compressed z-stacks of the entire section (~10  $\mu$ m).

### Cell counting

The numbers of taste buds and type II/III taste cells were counted manually, including both lateral trench walls and the dorsum of the circumvallate papilla. Typically, a total of 30-40 sections that spanned the entire circumvallate papilla were collected on 10 glass slides, as follows: slide 1 contained sections 1, 11, 21 (and 31 if available); slide 2 contained sections 2, 12, 22, (32), and so forth. This way, each slide provides an accurate sampling of an entire circumvallate papilla. For each slide, the section in the middle of the circumvallate papilla with slightly more taste buds or taste cells was used for cell counting, measurement of the depth of the trench, and statistical analysis, to alleviate potential sampling bias

associated with sections at the most anterior or posterior portions of the circumvallate papilla, for every mouse, regardless of genotype. KI-67<sup>+</sup> cells in the dorsal lingual epithelium were counted using serial sagittal sections of anterior tongues. Sections that did not have fungiform papillae were used for counting (one section counted for each mouse).

### **RNA isolation and quantitative PCR**

cDNA was synthesized using SuperScript™ IV VILO™ Master Mix with ezDNase™ Enzyme (Invitrogen, no. 11766500), and qPCR was performed using Fast SYBR™ Green Master Mix Kit (Applied Biosystems, no. 4385612). *Gapdh* was used as control to normalize the expression levels of analyzed gene transcripts. The relative gene expression was calculated as  $2^{-(CT_{\text{target}} - CT_{\text{Gapdh}})}$ . The primers used were intron spanning, with the following sequences: 5'-accatagcagaccggatcctc-3' (*Rnf43* forward), 5'-ctcgtggaggcacgaaatga-3' (*Rnf43* reverse), 5'-acattgacggagaggagctt-3' (*Znrf3* forward), 5'-cacacggcctgggtaatga-3' (*Znrf3* reverse), 5'-TGGCCTTCCGTGTTCCCTAC-3' (*Gapdh* forward), 5'-GAGTTGCTGTTGAAGTCGCA-3' (*Gapdh* reverse).
